1 **Title: Adaptive introgression: an untapped evolutionary mechanism for**  
2 **crop adaptation**

3 **Authors:**

4 Concetta Burgarella<sup>1,2,3,4\*</sup>, Adeline Barnaud<sup>1,2</sup>, Ndjido Ardo Kane<sup>5,6</sup>, Frédérique Jankowsky<sup>7,8,9</sup>, Nora  
5 Scarcelli<sup>1,2</sup>, Claire Billot<sup>3,4</sup>, Yves Vigouroux<sup>1,2</sup>, Cécile Berthouly-Salazar<sup>1,2,6\*</sup>

6 <sup>1</sup>IRD, UMR DIADE, Montpellier, France

7 <sup>2</sup>Université de Montpellier, Montpellier, France

8 <sup>3</sup>CIRAD, UMR AGAP, F-34398 Montpellier, France

9 <sup>4</sup>AGAP, Univ Montpellier, CIRAD, INRA, Montpellier SupAgro, Montpellier, France

10 <sup>5</sup>Institut Sénégalais de Recherches Agricoles (ISRA), LNRPV, Dakar, Senegal

11 <sup>6</sup>Laboratoire Mixte International LAPSE, Dakar, Senegal

12 <sup>7</sup>CIRAD, UPR GREEN, F-34398, Montpellier, France

13 <sup>8</sup>GREEN, CIRAD, Univ Montpellier, Montpellier, France.

14 <sup>9</sup>Institut Sénégalais de Recherches Agricoles (ISRA), BAME, Dakar, Senegal

15

16

17 **Corresponding authors:**

18 \* Concetta Burgarella: [concetta.burgarella@gmail.com](mailto:concetta.burgarella@gmail.com)

19 \* Cécile Berthouly-Salazar: [cecile.berthouly@ird.fr](mailto:cecile.berthouly@ird.fr)

20

21 **Running title:** Adaptive introgression: an untapped evolutionary mechanism for crop adaptation

22

23 **Number of words:** 5900

24 **Number of Figures:** 4

25

26 **Keywords:** crops, wild relatives, domestication, selection, gene flow, adaptive introgression, farmer's  
27 practices.

28

29 **ABSTRACT**

30 Global environmental changes strongly impact wild and domesticated species biology and their  
31 associated ecosystem services. For crops, global warming has led to significant changes in terms of  
32 phenology and/or yield. To respond to the agricultural challenges of this century, there is a strong  
33 need for harnessing the genetic variability of crops and adapting them to new conditions. Gene  
34 flow, from either the same species or a different species, may be an immediate primary source to  
35 widen genetic diversity and adaptations to various environments. When the incorporation of a foreign  
36 variant leads to an increase of the fitness of the recipient pool, it is referred to as “adaptive  
37 introgression”. Crop species are excellent case studies of this phenomenon since their genetic  
38 variability has been considerably reduced over space and time but most of them continue  
39 exchanging genetic material with their wild relatives. In this paper, we review studies of adaptive  
40 introgression, presenting methodological approaches and challenges to detecting it. We pay  
41 particular attention to the potential of this evolutionary mechanism for the adaptation of crops.  
42 Furthermore, we discuss the importance of farmers’ knowledge and practices in shaping wild-to-  
43 crop gene flow. Finally, we argue that screening the wild introgression already existing in the  
44 cultivated gene pool may be an effective strategy for uncovering wild diversity relevant for crop  
45 adaptation to current environmental changes and for informing new breeding directions.

46

## 47 1. Introduction

48 The fate of wild and domesticated species and their associated ecosystem services is increasingly  
49 depending on global environmental changes, as climate warming, nitrogen cycle alteration or land  
50 use (Perring et al., 2015; Shibata et al., 2015; Walther et al., 2002). For instance, modifications of  
51 temperature and rainfall regimes have been shown to directly impact on plant phenology or  
52 distribution within these past decades. A meta-analysis including nearly 1600 species showed that  
53 41% of them had experienced phenological advancement and northward range movement  
54 (Parmesan and Yohe, 2003). In a mountain area, Crimmins et al. (2011) documented downward  
55 elevation shifts driven by water deficits in 64 plant species. Forest inventories across the eastern  
56 USA revealed direct effects of climate on forest biomass, through changes in tree species  
57 composition towards species more drought-tolerant, but slower growing. Climate effects have also  
58 been reported on major crop species. Global maize and wheat yield has declined by 4-6% since the  
59 early 1980s (Lobell et al., 2011). Earlier flowering and changes in genetic composition have been  
60 recorded in the staple African cereal pearl millet (Vigouroux et al., 2011). Reduced flowering time  
61 and loss of genetic diversity in response to increasing temperatures have also been observed in wild  
62 wheat and barley over less than 30 years (Nevo, 2012). Future climate scenarios foresee an  
63 acceleration of the rise in temperature and an increase in hydrological variability (IPCC, 2014),  
64 which are probably the prelude to further dramatic consequences for species biology.

65  
66 Phenotypic plasticity and dispersal (through seeds and pollen) can be very rapid responses to  
67 change, but it is less clear whether adaptation, the evolution of genetic traits making organisms  
68 better fitted to survive and reproduce in their environment, could also play a significant role in this  
69 process. The ability to adapt to new conditions depends on the rate of environmental change (Loarie  
70 et al., 2009) and on the genetic variability available (Doi et al., 2010; Hoffmann et al., 2017). The  
71 genetic diversity of a population relies either on standing genetic variation or on new genetic  
72 variants. On short time scales, the mutation rate may be too low. Moreover, standing genetic  
73 variation may be limited, especially for populations whose genetic diversity has been reduced by  
74 demographic bottlenecks, as many domesticated species (Glémin and Bataillon, 2009). However,  
75 new variants could arise from gene flow, in numbers up to two or three orders of magnitude more  
76 than that introduced by mutation (Grant and Grant, 1994). Thus, gene flow, either from the same  
77 species or a different species, may amount to an immediate primary source of functional alleles  
78 (Ellstrand, 2014). If a foreign functional variant increases the fitness of the recipient pool, it  
79 increases in frequency across generations, a phenomenon referred to as “adaptive introgression”  
80 (Anderson, 1949; Rieseberg and Wendel, 1993).

81  
82 Prior to any possible “adaptive introgression”, hybridization/gene flow events need to take place.  
83 However, the fate of hybrids is uncertain. Hybrids are usually selected against in parental habitats  
84 (Baack et al., 2015) because they show reduced fertility and viability (Lowry et al., 2008). This  
85 process might be due to genetic incompatibilities and/or the break-up of epistatic co-adapted gene  
86 complexes (Barton and Hewitt, 1985; Hewitt, 1988). Yet, when species are not too divergent and  
87 isolating barriers are incomplete (Coyne and Orr, 2004), hybridization can lead to the introgression  
88 of advantageous alleles (Barton and Bengtsson, 1986). Compared to neutral introgression, which  
89 could be lost by drift across generations, adaptive introgression would be maintained and may  
90 eventually give rise to fixation (Figure 1). Interestingly, hybridization has the potential to introduce  
91 large sets of new alleles simultaneously at multiple unlinked loci, allowing adaptation even for  
92 polygenic traits (Abbott et al., 2013; Mallet, 2007), thus playing a key role in species evolution (e.g.  
93 Arnold and Kunte, 2017; Arnold and Martin, 2009; Hedrick, 2013).

94  
95 In the context of species conservation and management a large body of literature discuss how gene  
96 flow could also be associated with negative effects. Undesirable consequences of gene flow are

97 associated with the risks of invasiveness (Ellstrand and Schierenbeck, 2000; Whitney et al., 2006),  
98 transgene escape (Ellstrand et al., 2013 and references therein), or genetic erosion of native  
99 populations (Wolf et al., 2001). Little attention has been paid to the potential of managed gene flow  
100 to increase genetic variation for species rescue (Hedrick, 2009) and adaptation (Aitken and  
101 Whitlock, 2013). Up to now, the potential of adaptive introgression as a source of adaptation to on-  
102 going global changes for domesticated species has been overlooked.

103  
104 In this paper, we review studies of adaptive introgression, paying particular attention to the potential  
105 of this evolutionary mechanism for the adaptation of crops. By the term ‘introgression’ we mean the  
106 consequence of gene flow, at both the interspecific and the intraspecific level, i.e. independently of  
107 the taxonomic classification of the gene pools exchanging genetic material. We focus on sexually  
108 reproductive organisms; and we did not directly discuss horizontal gene transfer (reviewed in  
109 Arnold and Kunte, 2017). Within this framework, we report on 34 case studies addressing adaptive  
110 introgression (Table 1). After discussing methodological approaches and challenges to detecting  
111 adaptive introgression, we focus on gene flow in crops and the importance of farmer practices in  
112 shaping wild-to-crop gene flow.

## 113 114 **2. Empirical evidence of adaptive introgression**

115  
116 Despite the occurrence of hybridization in nature, involving 25% of plants and 11% of animals  
117 (Mallet, 2005), relatively little evidence supports the fact that gene flow leads to enhanced fitness,  
118 i.e. adaptive introgression. This may be because investigating the fitness of adaptive introgression  
119 is intrinsically difficult. For example, demonstrations of adaptive introgression in *Helianthus* were  
120 based on crossing and backcrossing to experimentally reproduce introgression and demonstrate  
121 enhanced fitness in the recipient taxon (Whitney et al., 2006, 2010). With high-throughput  
122 sequencing technologies, we can instead search for selection signatures on the introgressed variant  
123 in the recipient genomes (e.g. Arnold et al., 2016; Racimo et al., 2015). An increasing number of  
124 publications involving large-scale genetic data are accumulating in this field (Table 1). Those  
125 studies reveal or confirm instances of adaptive introgression in many kinds of organisms, including  
126 domesticated species (e.g. Anderson et al., 2009; Hufford et al., 2013; Kovach et al., 2009; Miao  
127 et al., 2016; Rochus et al., 2017). It also appears that different abiotic and biotic selective pressures  
128 drive the introgression of adaptive traits, with evolutionary consequences spanning different spatial  
129 and temporal scales.

130  
131 Recent striking studies report ancient adaptive introgression events in animals or humans. Up to 5%  
132 of the modern human genome might be of introgressed origin from archaic hominins (e.g. Green et  
133 al., 2010; Hsieh et al., 2016; Reich et al., 2009; Sankararaman et al., 2014). Introgressed loci from  
134 Neanderthals or Denisovans appear to be linked to skin colour phenotypes (Vernot and Akey,  
135 2014), immune responses (Abi-Rached et al., 2011) and hypoxia adaptation to high altitudes  
136 (Huerta-Sánchez et al., 2014). In animals, Tibetan Mastiff dogs were also found to have received a  
137 genomic region encompassing two genes linked to hypoxia adaptation (the *EPAS1* and the *HBB*  
138 genes) from the local populations of grey wolf (Miao et al., 2016; Zhang et al., 2014). On the other  
139 hand, the American grey wolf inherited an adaptive allele for coat pigmentation from past  
140 hybridization with domestic dogs (Anderson et al., 2009). In Chinese and European pigs, gene flow  
141 would seem to date from the Pleistocene era, when northern Chinese and European breeds would  
142 appear to have acquired a large adaptive genomic region from a *Sus* species that is now extinct (Ai  
143 et al., 2015).

144  
145 Adaptive introgression can also take place on a much shorter evolutionary time scale. For instance,  
146 the acquisition of pesticide resistance through genetic exchange can be achieved in a few decades,

147 as observed in insects (Lynd et al., 2010; Weetman et al., 2010) and rodents (Liu et al., 2015; Song  
148 et al., 2011). A mutation in the voltage-gated sodium channel gene (*kdr*) provides strong resistance  
149 to pyrethroid and dichlorodiphenyltrichloroethane (DDT) in the mosquito *Anopheles gambiae*, one  
150 of the vectors of malaria in sub-Saharan Africa. The resistance allele was transferred from *A.*  
151 *gambiae sensu stricto* (S form) to a conspecific *A. coluzzi* (M form) (Weill et al., 2000) and its  
152 frequency has greatly increased in *A. coluzzi* populations over the past two decades (Lynd et al.,  
153 2010; Norris et al., 2015). Selection tests and demographic simulations suggest this increase has  
154 been driven by selection (Lynd et al., 2010; Weetman et al., 2010). Another recent example of  
155 adaptive introgression in plants has been discovered in a population of *Arabidopsis arenosa* (Arnold  
156 et al., 2016) using genome scans. Several genomic signatures of selection associated with  
157 adaptation to serpentine soils were found to be of introgressed origin from a different species, *A.*  
158 *lyrata*. The uncontrolled escape of agricultural adaptations (e.g. resistance to biotic and abiotic  
159 stressors, often achieved with transgenes) from fields to wild populations, through weedy forms, is  
160 another well-known case of rapid adaptive introgression. This causes substantial yield losses and  
161 requires strong economic efforts in managing cultivated and wild species (e.g. Ellstrand et al., 2013;  
162 Hooftman et al., 2007; Rose et al., 2009; Uwimana et al., 2012).

163

164

### 165 **3. Characterizing adaptive introgression with genetic data**

166

167 To infer adaptive introgression, it is necessary to demonstrate 1) the introgression, by showing the  
168 foreign origin of the genetic variant and its persistence in the recipient pool (i.e. should be found in  
169 backcrossed generations), and 2) its adaptive value, by identifying selection footprints on the  
170 introgressed fragment and (if possible) its fitness value. Genomic studies of adaptive introgression  
171 seek to aim at gathering these three lines of evidence. Because of multiples factors (migration rate,  
172 number of generations since introgression, intensity of selection) affecting the introgression process  
173 and its interaction with selection, a variety of genomic patterns can be observed in the recipient  
174 population (Figure 1). As these are complex patterns, there is no unique approach to detecting  
175 signatures of adaptive introgression (Table 1). Below, we detail some of the most common  
176 approaches used to detect introgression and to prove the action of selection (cf. Table 1).

177

#### 178 **3.1 Detection of introgression**

179

180 The aim of detecting introgression is to identify populations and individuals of admixed origin and  
181 quantify rates of gene flow, but also to find the traits or the genomic regions that have crossed  
182 isolation barriers. Availability of whole genome data maximizes the chances of detecting  
183 introgression even when it is rare in the genome (Hufford et al., 2013; Racimo et al., 2015; Rochus  
184 et al., 2017; Schaefer et al., 2016). In the following sections, we describe approaches used to detect  
185 introgression with genetic data, bearing in mind that none of them provides absolute proof of  
186 introgression and that the best strategy is to gather evidence in different ways.

187

188 The ability to detect introgression increases with the divergence between the hybridizing taxa. For  
189 higher divergent taxa, we have more markers fixed between species or with large allele frequency  
190 differences. These “diagnostic alleles” allow easy identification of the ancestry of a genomic  
191 fragment in the recipient population (e.g. Gittelman et al., 2016; Kim et al., 2008; Kovach et al.,  
192 2009; Norris et al., 2015; Smith et al., 2004). However, even with slight differences in allele  
193 frequencies, genetic clustering methods can be used to identify introgression. A variety of  
194 approaches are available, such as multivariate analyses (e.g. Frichot et al., 2014; Jombart et al.,  
195 2009) or Bayesian algorithms (e.g. Alexander et al., 2009; Anderson and Thompson, 2002;  
196 Pritchard et al., 2000) (Figure 2a). The power of these global ancestry methods to detect gene flow

197 comes from the use of multiple independent (i.e. not physically linked) polymorphic markers. These  
198 methods can be applied both genome-wide (Gagnaire et al., 2009; e.g. Rochus et al., 2017) and to  
199 single genomic regions. Window-based analyses of ancestry along the maize genome were  
200 successfully used to identify introgressed fragments from the wild progenitor teosinte (Hufford et  
201 al., 2013).

202  
203 When higher density molecular markers are available, other recent methods are able to assign an  
204 ancestry probability to each polymorphic variant (Racimo et al., 2015; Schaefer et al., 2016). These  
205 local ancestry methods use probabilistic approaches, such as Hidden Markov Models (e.g. Reich et  
206 al., 2012), or Conditional Random Fields (e.g. Sankararaman et al., 2014) to infer the ancestry state  
207 of each site, taking into account the information of physically close positions. As physical linkage  
208 disequilibrium patterns dilute with generations, these approaches are less efficient for the detection  
209 of ancient introgression, compared to global ancestry methods. While some implementations  
210 require phased data (e.g. Song and Hein, 2005) or training data (e.g. Sankararaman et al., 2014),  
211 more recent developments have overcome these constraints (e.g. Guan, 2014). So far, such  
212 approaches have been mainly applied to model species (e.g. Staubach et al., 2012 on *Mus musculus*;  
213 Turissini and Matute, 2017 on *Drosophila*; Zhou et al., 2016 on humans), but the increasing  
214 availability of whole genome data will soon make them suitable for other study systems.

215  
216 The approaches described above help to quantify the amount of shared diversity between genetic  
217 pools. Shared variants between populations may be the result of different processes other than  
218 introgression: the retention of ancestral polymorphic alleles by chance (referred to as Incomplete  
219 Lineage Sorting, ILS, Figure 3), balancing selection or convergence (see Hedrick, 2013 for a  
220 comparison). For lower divergence times (as for wild-crop complexes), the probability that the two  
221 related groups have conserved ancestral polymorphism is higher. Thus, in most cases, the main  
222 challenge to detecting introgression is to distinguish it from ancestral shared polymorphism.  
223 Tracking the absence of the introgressed variants in ancient samples of the recipient pool would be  
224 an efficient way of excluding shared ancestral polymorphism. However, historical samples are  
225 difficult to obtain for most biological systems, so different methods have been developed to search  
226 for specific signatures on the genome that help to differentiate between introgressed fragments and  
227 inherited ancestral fragments.

228  
229 Coalescent samplers have been widely used to test for gene flow versus ILS using maximum  
230 likelihood or Bayesian models (Pinho and Hey, 2010). However, they are not straightforwardly  
231 applied to all study systems, because they require a strong computation effort and are not easy to  
232 transpose to a genome-wide scale. An alternative, simpler strategy takes advantage of the  
233 expectations associated with phylogenetic relationships between individuals or populations (Figure  
234 3). Given a genealogical tree describing the history of divergence between taxa or populations, a  
235 precise amount of shared variation between branches is expected because of drift and ILS. A  
236 significant excess of shared variation instead may be indicative of gene flow (Kulathinal et al.,  
237 2009; Patterson et al., 2012; Peter, 2016). A number of statistics have been developed to test for the  
238 excess of shared polymorphism. The most used are the D-statistic (or ABBA-BABA test, Durand et  
239 al., 2011; Green et al., 2010) and the  $f_3$  and  $f_4$  statistics (globally referred to as  $f$ -statistics, Reich et  
240 al., 2009, 2012). These statistics were initially applied to human populations and have proven to be  
241 useful in other study systems, e.g. to detect the introgression of adaptation to serpentine soils in  
242 *Arabidopsis* species (Arnold et al., 2016). In general, the power of these tests to detect admixed  
243 genomes or populations is greater when applied to genome-wide data (see Patterson et al., 2012 for  
244 a review; Peter, 2016), but most recent statistics can be applied to small genomic regions, e.g.  $f_D$   
245 (Martin et al., 2015; Racimo et al., 2017).

246

247 Other approaches take advantage of haplotype characteristics to distinguish between introgression  
248 and ILS. As recombination breaks apart haplotypes over generations, introgressed haplotypes  
249 should be longer than haplotypes due to ILS and should exhibit higher levels of linkage  
250 disequilibrium (see figure 1 from Racimo et al., 2015). If admixture occurred recently compared to  
251 the divergence between populations, these features can be exploited to detect introgressed tracts. A  
252 test of significance can be associated by performing coalescent simulations of specific demographic  
253 scenarios (setting values of divergence times, recombination rates, population structure or selection  
254 adapted to the case in hand) to obtain the expectations for haplotype length statistics in the absence  
255 of gene flow. Haplotype length analyses led to the identification of candidate introgressed tracts and  
256 estimation of the age of the last introgression event in humans (Racimo et al., 2015) and dogs (Miao  
257 et al., 2016). A recently developed statistic,  $S^*$ , uses linkage disequilibrium information to detect  
258 introgressed haplotypes when no information about the donor is available.  $S^*$  is designed to identify  
259 divergent haplotypes whose variants are in strong linkage disequilibrium and are not found in a  
260 non-admixed reference population.  $S^*$  increases as the number of linked SNPs and the distance  
261 between them increases (Vernot et al., 2016). This statistic helped to reveal the introgressed origin  
262 of the EPAS1 gene in Tibetans, before the identification of the Denisovan donor (Huerta-Sánchez et  
263 al., 2014).

### 264 265 **3.2 Detection of selection**

266  
267 To prove adaptive introgression, the action of selection has to be demonstrated on the introgressed  
268 variant. A number of reviews address methods and tools for detecting selection with molecular data  
269 (e.g. Bank et al., 2014; Pavlidis and Alachiotis, 2017). In practice, most of the available approaches  
270 are more sensitive to signatures of strong positive selection (i.e. selective sweeps, Smith and Haigh,  
271 1974). For regions under strong positive selection, expectations are lower diversity, higher linkage  
272 disequilibrium and specific distortions of the allele frequency spectrum compared to the genome-  
273 wide patterns.

274  
275 In within-population analyses, local patterns of lower genome diversity (Figure 2b) and shifts of the  
276 allele frequency spectrum toward an excess of low frequency alleles are often informative for  
277 detecting positive selection. For instance, polymorphism summary statistics, such as  $\pi$  (nucleotide  
278 expected heterozygosity) and Tajima's  $D$ , have helped to discover and characterize introgressed loci  
279 involved in serpentine adaptation of *Arabidopsis arenosa* (Arnold et al., 2016) and in the pesticide  
280 resistance of mosquitoes (Norris et al., 2015) and mice (Song et al., 2011). Advanced methods for  
281 genomic scans of positive selection are the Composite Likelihood Ratio test approaches (reviewed  
282 in Pavlidis and Alachiotis, 2017). These tests compare the probability of the observed local site  
283 frequency spectrum under a model of selection with the probability of observing the data under the  
284 standard neutral model. The neutral expectations can be inferred by genome-wide observed patterns  
285 or by specific simulated demographic scenarios (e.g. Liu et al., 2015; Quach et al., 2016; Staubach  
286 et al., 2012).

287  
288 Haplotypic information is also extremely useful for identifying almost fixed or very recently fixed  
289 selective sweeps. The frequency of the introgressed haplotype in the recipient population can serve  
290 for identifying selection. This interpretation is based on the assumption that introgressed regions  
291 under selection should be at higher frequencies in the population relatively to the rest of the genome  
292 (e.g. Vernot et al., 2016). The extent of linkage disequilibrium generated on the sides of a beneficial  
293 mutation (or the haplotype size) is another signature captured by a number of tests for selection  
294 (Crisci et al., 2012). The BADH2 gene, responsible for the much-appreciated characteristic  
295 fragrance of some Asian rice varieties, provides a nice example of adaptive introgression detected  
296 by haplotype analysis. This gene only shows strong signatures of selection in fragrant accessions, as

297 revealed by a dramatic reduction in diversity ( $\pi$ ) and a large block of linkage disequilibrium in  
298 regions flanking the functional mutation. The selected fragrant allele is likely to have originated  
299 after domestication in the genetic background of the *japonica* varietal group and to have been  
300 transferred to the *indica* variety by introgression (Kovach et al., 2009).

301  
302 Extreme differentiation between populations in specific genomic regions can also be interpreted as  
303 a signature of selection subtending local adaptation. For introgressed alleles adaptive in the  
304 recipient population, higher differentiation can be expected between the recipient and another non-  
305 admixed population (e.g. Ai et al., 2015). In addition, recipient-donor differentiation will be lower  
306 for introgressed regions compared to the rest of the genome (Figure 2b). Thus, comparisons of  
307 pairwise differentiation values between different populations (i.e. donor, recipient and “reference”  
308 non-admixed population) may help to disentangle instances of adaptive introgression (e.g. Arnold et  
309 al., 2016; Enciso-Romero et al., 2017; Racimo et al., 2017). A number of differentiation/divergence  
310 statistics with different properties are available (e.g. Cruickshank and Hahn, 2014). Among them,  
311 estimators of  $F_{ST}$  (Wright, 1931) are the most commonly used for detecting selection (e.g. Arnold et  
312 al., 2016; Gagnaire et al., 2009; Gittelman et al., 2016).

313  
314 It should be noted, however, that inferring separately introgression and selection might not be the  
315 best approach to detect adaptive introgression, as expected genetic patterns are not necessarily the  
316 same. For example, we do not necessarily expect a reduction of diversity in an introgressed region  
317 under positive selection. In fact, it has been shown by simulations that admixture can increase  
318 diversity blowing the diversity loss due to selection (Racimo et al., 2017). Recent investigations  
319 into the joint dynamics of introgression and positive selection have opened promising avenues for  
320 the analysis of genetic data in quest of adaptive introgression instances (Racimo et al., 2017). These  
321 authors proposed new statistics informative to identify candidates to adaptive introgression and  
322 based to the number and frequency of alleles shared by the donor and the recipient populations (but  
323 absent or nearly absent in non-introgressed reference populations). Such “unique shared alleles”  
324 should be numerous and at high frequency in genomic regions interested by adaptive introgression  
325 (Figure 3c). The proposed statistics resuming these patterns, Q95 and U, have proven successful to  
326 retrieve several known regions of archaic adaptive introgression from Neanderthals and Denisovans  
327 in modern human genome (Racimo et al., 2017). However, these statistics are not straightforwardly  
328 applicable to any study system. Specific demographic simulations are necessary to assess their  
329 expected value in absence of adaptive introgression.

330  
331 Different types of selection other than selective sweeps may generate genetic patterns that are more  
332 difficult to distinguish from non-selective processes with the approaches described above.  
333 Balancing selection on an introgressed locus, for instance, might go undetected because it would  
334 maintain several variants at intermediate frequency within the recipient population. Such a pattern  
335 can be interpreted as the result of migration-drift equilibrium, unless a direct link has been  
336 established between the locus and a phenotypic trait. Examples of adaptive introgression driven by  
337 balancing selection are the incompatibility locus in *Arabidopsis* (Castric et al., 2008), skin colour  
338 change in wolves (Anderson et al., 2009; von Holdt et al., 2016) and the HLA locus in humans  
339 (Abi-Rached et al., 2011). Soft-sweeps, fixation of a beneficial allele starting from multiple copies  
340 of it in the population (Hermisson and Pennings, 2005), could also interest introgressed regions.  
341 Typically, when the migration rate is high, the same beneficial allele can enter the recipient  
342 population associated with different genetic backgrounds. This kind of positive selection signature  
343 is difficult to detect because diversity and site frequency spectrum patterns do not change  
344 dramatically as in hard selective sweeps (Hermisson and Pennings, 2017).

345



346 It should be noted also that inferences of selection based on molecular data only give indirect  
347 evidence of the adaptive value of introgressions, particularly when they target genomic regions with  
348 an unknown contribution to fitness-related traits (e.g. Gagnaire et al., 2009). However, detecting  
349 selection in genic regions linked to specific functions or phenotypes (shown by phenotype-genotype  
350 association analysis for instance) greatly helps the interpretation in terms of adaptation (e.g.  
351 Hufford et al., 2013; Racimo et al., 2015; Rochus et al., 2017). Ultimately, one direct validation of  
352 the adaptive role of introgression is to demonstrate the fitness advantage of the introgressed allele or  
353 trait for the recipient population (e.g. Martin et al., 2006; Whitney et al., 2006, 2010, 2015; Figure  
354 4). However, field studies involving phenotypic exploration can be time-consuming and difficult to  
355 implement for most species.

356

#### 357 **4. Gene flow in crops: challenges and opportunities**

358

359 The domestication process often involves dispersion across long distances and different  
360 environmental conditions, combined with intense selection. Under such a process, multiple  
361 opportunities arise for gene flow with locally adapted cultivated or wild forms (Allaby et al., 2008;  
362 Meyer and Purugganan, 2013). In addition, among domestication characters, genetic divergence  
363 between domesticated and wild relatives is often low and the reproductive barriers narrow (e.g.  
364 Dempewolf et al., 2012). These characteristics make domesticated species likely carriers of  
365 adaptive introgression.

366

367 Thanks to the analysis of genome-wide data, the importance of gene flow in shaping today's  
368 diversity of domesticated species is becoming evident, particularly in crops. The evolution of two  
369 major cereals, rice and barley, fits a domestication history with frequent gene flow events. In rice,  
370 complex introgressive hybridizations have shuffled the genome of Asian rice, leading to the current  
371 main groups *O. sativa japonica* and *O. s. indica*. Surveys indicate that *O. s. indica* had acquired  
372 major domestication alleles through gene flow from *O. s. japonica* into the wild progenitor *O.*  
373 *rufipogon*, or into putative proto-*indica* populations (Choi et al., 2017). White pigmentation,  
374 aromatic fragrance and glutinous starch are some of the phenotypic traits involved in allele transfers  
375 driven by strong directional selection (Huang et al., 2012; Kovach et al., 2009; Olsen and  
376 Purugganan, 2002). In barley, the genome of domesticated forms appears to be a mosaic of  
377 fragments originating from different cultivated and wild populations across the Fertile Crescent  
378 (Pankin and von Korff, 2017; Poets et al., 2015). Introgression from local wild relatives has also  
379 been shown in grapes (Myles et al. 2011), apples (Cornille et al., 2012) and olives (Diez et al.,  
380 2015). Similarly, gene flow events have occurred in domesticated animals. For instance, Rochus et  
381 al. (2017) analyzed the diversity of French sheep breeds to find that one mutation in a genomic  
382 region related to milk production and growth originated in a southern breed and was introgressed  
383 and selected for in northern breeds.

384

385 While adaptive introgression of agronomic traits between different breeds or cultivars may occur  
386 relatively easily under similar human selective pressures, the transfer of beneficial traits from wild  
387 relatives seems more difficult, since selection in natural environments usually goes in the opposite  
388 direction from selection in agricultural environments. Crop-wild admixed plants (weeds) may tend  
389 to be phenotypically intermediate and thus to have unwanted wild-type traits (e.g. asynchrony of  
390 phenology changes, multiple branching, seed shattering, noxious or unpalatable compounds). To  
391 understand how wild alleles can enter the crop gene pool by spontaneous gene flow, Jarvis and  
392 Hodgkin (1999) point to the necessity of understanding how farmers' taxonomy and practices (i.e.  
393 seed management, weeding, etc.) are applied to the new phenotypic variations resulting from  
394 hybridization. Barnaud et al. (2009) investigated criteria used by farmers to characterize  
395 morphotypes of domesticated and weedy sorghum. While strong counter-selection was performed

396 against weedy types, they found that progenies of weedy types could be misidentified as cultivated  
397 forms, thus favoring wild-to-crop introgression. For pearl millet, it has been suggested that  
398 incomplete weeding and singling allow hybridization and introgression to occur freely and  
399 extensively (Couturon et al., 1997; Robert et al., 2003, Mariac et al. 2006), favoring the  
400 maintenance of wild genetic material in the cultivated gene pool. In addition, weedy types can play  
401 an important role for food security. In many cases, weedy types are early maturing plants and they  
402 are used under harsh conditions or between main harvests. In Sudan, farmers recognize a crop-wild  
403 hybrid of sorghum, which is allowed to grow and is selectively harvested in bad years (Ejeta and  
404 Grenier, 2005). Hybrids can be harvested during periods of scarcity in the case of pearl millet too  
405 (Couturon et al., 2003; Mariac et al., 2006) or in common bean (de la Cruz et al., 2005; Zizumbo-  
406 Villarreal et al., 2005). Some studies have also documented farmers practicing conscious directional  
407 selection towards evolution and changes of cultivated phenotypes by using the diversity available in  
408 the wild relatives. For instance, in Benin, farmers voluntarily grow wild and hybrid yams  
409 (*Dioscorea* spp.) in their fields to increase diversity (Scarcelli et al., 2006).

410  
411 All in all, this demonstrates how farmer practices can maintain and, in some cases, actively favor  
412 wild-to-crop introgression. This can be particularly important for crop adaptation, since the trade-off  
413 of strong human selection for certain traits has been the loss of diversity for other important adaptive  
414 traits (e.g. Zheng et al., 2008). Notably, traits involved in climate and soil adaptation, or resistance to  
415 pests and diseases, display much greater diversity in wild species than in domesticated species  
416 (Dempewolf et al., 2017; Guarino and Lobell, 2011; Hajjar and Hodgkin, 2007). Therefore, favoring  
417 introgression from wild relatives may be an indirect way for farmers to introduce lost or new  
418 adaptations. A compelling example of the potential adaptive outcome of wild-to-crop introgression is  
419 the adaptation to altitude acquired by highland maize landraces. Maize was domesticated from low  
420 altitude wild populations of teosinte (*Zea mays* ssp. *parviglumis*) and colonized high altitude  
421 environments (Matsuoka et al., 2002) where a different wild relative is found (*Z. m. mexicana*).  
422 Hufford et al. (2013) performed genomic scans on Mexican sympatric populations of maize and  
423 *mexicana* and found nine genomic regions of introgression of *mexicana* into maize landraces. These  
424 regions, related to adaptive traits, such as the quantity of leaf macrohairs and pigmentation intensity,  
425 could have helped maize to adapt to high altitude (Hufford et al., 2013). Recent study suggested that  
426 wild-to-crop gene flow significantly genetic diversity and possibly lead to introgressions of local  
427 adaptation in pearl millet, a major staple African crops (Burgarella et al., in press).

428  
429 The transferal of wild traits into a cultivated genetic background through classic breeding programs  
430 has so far been limited to a narrow range of traits (Warschefsky et al., 2014), e.g. disease resistance in  
431 cassava (Bredeson et al., 2016) and tomatoes (Lin et al., 2014). One main difficulty for conventional  
432 breeding in introgressing wild genes into cultivated gene pools is that wild diversity is mostly  
433 unexplored and desirable characters have still to be identified. Furthermore, wild species have many  
434 traits associated with poor agronomic performance (e.g. low yields, seed shattering, small seed or  
435 fruit size). Thus, several backcrosses are necessary to dilute the unwanted diversity associated with  
436 wild introgression (Dempewolf et al., 2017) or to produce specifically design lines in which small  
437 regions of the wild relative are introduced (e.g. Fonceka et al., 2012). We argue that screening the  
438 wild introgression already existing in the cultivated gene pool thanks to natural gene flow may be an  
439 effective strategy to uncover wild diversity relevant for crop adaptation to environmental changes and  
440 to inform new breeding directions. Therefore, research efforts should be devoted to quantifying and  
441 characterizing the extent of such spontaneous wild-to-crop introgression. Two main challenges are  
442 associated with this approach. First one will need to have access to wild “pure” genetic resources,  
443 which highlight the crucial need of wild relative conservation programs. Second, identification of  
444 adaptive introgression in crops might be more challenging because of the low genetic divergence  
445 usually observed between crop species and their wild relatives (as exposed in paragraph 3). However,

446 interest in the study of adaptive introgression, notably in humans, means the field is moving fast  
447 towards new analytical approaches designed to identify specific features in genomes (e.g. Racimo et  
448 al., 2017). Of course, the validation of adaptive introgression detected via molecular data should be  
449 validated with classic experiments (Figure 4) to measure the strength of selection in the field and to  
450 assess the biological function of the introgressed alleles (Suarez-Gonzalez et al., 2018; Whitney et al.,  
451 2006). Given their adaptation to human-controlled environments, this step seems easier to accomplish  
452 in most crops than in wild species.

453  
454 Regarding the introduction or re-introduction of adaptive variation, it might be wondered to what  
455 extent introgression from wild relatives can affect the whole crop genome. Recent studies have  
456 suggested that introgression can be favored at genome-wide level when it reduces the genetic load  
457 of the recipient species (Sankararaman et al., 2014; Wang et al., 2017). Genetic load refers to the  
458 genome-wide accumulation of weakly deleterious alleles that reduces its fitness (Crow, 1958).  
459 Given the repeated selection rounds associated with the domestication process, crop species  
460 experience a reduction in the effective population size and in effective recombination, which in turn  
461 reduces the efficacy of purifying selection in removing deleterious alleles and increases the effect of  
462 hitchhiking selection (i.e. deleterious variants increase in frequency because they are linked to  
463 selected beneficial alleles). Inbreeding, which is commonly practiced to fix traits of interest, also  
464 slightly contributes to fixing deleterious alleles. In crops, a reduction in fitness is expected  
465 compared to the wild progenitor, the so-called ‘cost of domestication’ (Lu et al., 2006). A greater  
466 genetic load than in the wild counterpart was observed in several domesticated species such as rice  
467 (Lu et al., 2006), maize (Wang et al., 2017), sunflower (Renaut and Rieseberg, 2015), dogs  
468 (Marsden et al., 2016) and horses (Schubert et al., 2014). Since wild species are expected to have a  
469 lower genetic load than cultivated species, spontaneous introgression from wild species could be  
470 favored, because it alleviates the domestication cost, even in the absence of strong directional  
471 selection on the introgressed alleles. Recent findings in maize support this expectation, as negative  
472 correlations were observed between wild introgression and genetic load (Wang et al. 2017).

473  
474 Despite the potential benefits of wild introgression for crops (i.e. acquisition of specific adaptations  
475 and reduction of genetic load), genomic heterogeneity is expected in terms of permeability to gene  
476 flow. In particular, regions involved in major domestication characters are expected to be under  
477 strong selection, thereby acting as barriers to gene flow (so-called “islands of domestication”, Frantz  
478 et al., 2015). Thus, the probability of introgression along the crop genome largely depends on the  
479 number and distribution of domestication loci. Loci responsible for domestication traits have been  
480 identified in a number of crops (Doebley et al., 2006; Gross and Olsen, 2010; Meyer et al., 2012), but  
481 knowledge is far from complete. Up to now, research on the genetic architecture of domestication  
482 traits indicates that domestication loci are limited to a few genomic regions in most studied species  
483 (Burger et al., 2008; Glémin and Bataillon, 2009) and may not be a major obstacle to introgression in  
484 the rest of the genome. The efficiency of counter-selection would thus depend on the genetic distance  
485 between the introgressed fragment and the domestication genes, which is determined by the extent of  
486 local linkage disequilibrium. According to this expectation, Hufford et al. (2013) identified cold spots  
487 and hotspots of wild introgression in the maize genome. Interestingly, cold spots were significantly  
488 enriched in domestication genes (Hufford et al., 2013).

489

## 490 **5. Conclusion and prospects**

491

492 Today’s access to both phenotypic and genomic information provides the opportunity to further  
493 investigate the role and mechanism of adaptive introgression in crops. From an applied point of  
494 view, it can be a fair source of adaptation to be exploited in breeding programs. Along human

495 migrations, crops had the opportunity to exchange with multiple wild populations. These exchanges  
496 might have resulted in the introgression of local adaptations that have already passed the  
497 reproductive and the “agronomic” barriers. Identifying such local adaptive introgression, combined  
498 with complementary tools (e.g. climatic modeling), could be an efficient way of adapting crops to  
499 the predicted new environmental conditions. We therefore think there is a need to emphasize the  
500 importance of conserving wild genetic resources and jointly investigating wild and crops relatives.  
501 This research will also allow advances on key questions with broader prospects, such as  
502 introgression rates and genome permeability (Hufford et al., 2013; Scascitelli et al., 2010). Genomic  
503 scan approaches could be complemented by the development of recombinant inbred line (RILs)  
504 wild-crop hybrid populations (e.g. Fonceka et al., 2012; Nice et al., 2016). Such pre-breeding  
505 material can be exchanged and tested in different environments, which would also help to answer  
506 the other side of the coin, the risk of transgene escapes in the case of crop-to-wild gene flow.

507  
508

509 **Acknowledgements**

510  
511 We thank Peter Biggins for English revision and Miguel Navascués for useful discussions on  
512 methodological approaches. This project was supported by Agropolis Fondation under the reference  
513 ID 1403-057 through the « *Investissements d'avenir* » programme (Labex Agro:ANR-10-LABX-  
514 0001-01) under the frame of I-SITE MUSE (ANR-16-IDEX-0006 and the the NERC/DFID Future  
515 Climate For Africa programme under the AMMA-2050 project, grant number NE/M019934/1.

516  
517 **Author contribution statement**

518  
519 CB, AB and CB-S wrote the first draft, all authors made a substantial, direct and intellectual  
520 contribution to this work.

521  
522 **Conflict of interest statement**

523  
524 The authors declare no conflict of interest.

525

526 **Table legends**

527 **Table 1. Summary of studies reviewed.** Species names for donor and recipient taxa are listed, as  
528 well as the type of data and methods used for 1) detection of the introgression and 2) detection of  
529 the selection. “Genomic data” term include s whole-genome sequences or candidates genes  
530 sequencing. “Genetic data refers to molecular markers such as QTL or SSR.

531

532

533

534

535 **Figure legends**

536

537 **Figure 1. Genomic signature of adaptive introgression.** A genomic fragment is transferred from  
538 the donor to the recipient population via gene flow and subsequent backcrosses. If it enhances the  
539 fitness of the recipient population, it experiences positive selection and rises in frequency.

540

541 **Figure 2. Approaches to detect introgression (a, b) and adaptive introgression (c).** Regions of  
542 donor origin in the recipient genome can be revealed by performing local ancestry analyses (a) and  
543 comparisons of donor-recipient differentiation levels (b). Introgressed fragments will show a larger  
544 proportion of ancestry in the donor population (a. in black) and lower differentiation (b. arrow) than  
545 non-introgressed recipient genomic regions. Positive selection increases the frequency of the donor  
546 allele and the neutral variants physically linked to it. The result is a local higher number and  
547 frequency of alleles shared by donor and recipient populations and absent in other non-introgressed  
548 populations (c. arrow).

549

550 **Figure 3. Hybridization and incomplete lineage sorting (ILS) revealed by molecular**  
551 **phylogenetics.** Top: evolutionary process. The species (or population) tree is represented by the  
552 grey area. The dotted line represents a single gene genealogy. Bottom: Coalescent tree inferred for  
553 the gene. (a) Congruent gene genealogy with species/population tree; (b) ILS: ancestral  
554 polymorphism is maintained before the divergence between A and B, so that B shares the allele T  
555 with C and not with A; (c) Introgression: B receives the allele T from C by gene flow. In the case of  
556 ILS and introgression, the gene genealogy is incongruent with the species/population tree.

557

558 **Figure 4. Direct measure of adaptive introgression.** Direct evidence of the adaptive value of the  
559 introgressed fragment (black segment) consists in showing that it confers greater fitness to the  
560 recipient genome. This can be achieved by experimental crosses: introgression without positive  
561 selection on the introgressed allele (A) vs adaptive introgression (B).

562

563

564

## 565 **References**

- 566
- 567 Abbott, R., Albach, D., Ansell, S., Arntzen, J. W., Baird, S. J. E., Bierne, N., et al. (2013).  
568 Hybridization and speciation. *J. Evol. Biol.* 26, 229–246. doi:10.1111/j.1420-  
569 9101.2012.02599.x.
- 570 Abi-Rached, L., Jobin, M. J., Kulkarni, S., McWhinnie, A., Dalva, K., Gragert, L., et al. (2011).  
571 The Shaping of Modern Human Immune Systems by Multiregional Admixture with Archaic  
572 Humans. *Science* 334, 89–94. doi:10.1126/science.1209202.
- 573 Ai, H., Fang, X., Yang, B., Huang, Z., Chen, H., Mao, L., et al. (2015). Adaptation and possible  
574 ancient interspecies introgression in pigs identified by whole-genome sequencing. *Nat.*  
575 *Genet.* 47, 217–225. doi:10.1038/ng.3199.
- 576 Aitken, S. N., and Whitlock, M. C. (2013). Assisted gene flow to facilitate local adaptation to  
577 climate change. *Annu. Rev. Ecol. Evol. Syst.* 44.
- 578 Alexander, D. H., Novembre, J., and Lange, K. (2009). Fast model-based estimation of ancestry in  
579 unrelated individuals. *Genome Res.* 19, 1655–1664. doi:10.1101/gr.094052.109.
- 580 Allaby, R. G., Fuller, D. Q., and Brown, T. A. (2008). The genetic expectations of a protracted  
581 model for the origins of domesticated crops. *Proc. Natl. Acad. Sci.* 105, 13982–13986.  
582 doi:10.1073/pnas.0803780105.
- 583 Anderson, E. (1949). Introgressive hybridization. ix + 109 pp.
- 584 Anderson, E. C., and Thompson, E. A. (2002). A Model-Based Method for Identifying Species  
585 Hybrids Using Multilocus Genetic Data. *Genetics* 160, 1217–1229.
- 586 Anderson, T. M., vonHoldt, B. M., Candille, S. I., Musiani, M., Greco, C., Stahler, D. R., et al.  
587 (2009). Molecular and Evolutionary History of Melanism in North American Gray Wolves.  
588 *Science* 323, 1339–1343. doi:10.1126/science.1165448.
- 589 Arnold, B. J., Lahner, B., DaCosta, J. M., Weisman, C. M., Hollister, J. D., Salt, D. E., et al. (2016).  
590 Borrowed alleles and convergence in serpentine adaptation. *Proc. Natl. Acad. Sci.*,  
591 201600405. doi:10.1073/pnas.1600405113.
- 592 Arnold, M. L., and Kunte, K. (2017). Adaptive Genetic Exchange: A Tangled History of Admixture  
593 and Evolutionary Innovation. *Trends Ecol. Evol.* 32, 601–611.  
594 doi:10.1016/j.tree.2017.05.007.
- 595 Arnold, M. L., and Martin, N. H. (2009). Adaptation by introgression. *J. Biol.* 8, 82.  
596 doi:10.1186/jbiol176.
- 597 Baack, E., Melo, M. C., Rieseberg, L. H., and Ortiz-Barrientos, D. (2015). The origins of  
598 reproductive isolation in plants. *New Phytol.* 207, 968–984.
- 599 Bank, C., Ewing, G. B., Ferrer-Admettla, A., Foll, M., and Jensen, J. D. (2014). Thinking too  
600 positive? Revisiting current methods of population genetic selection inference. *Trends*  
601 *Genet.* 30, 540–546. doi:10.1016/j.tig.2014.09.010.

- 602 Barnaud, A., Deu, M., Garine, E., Chantereau, J., Bolteu, J., Kořda, E. O., et al. (2009). A weed–  
603 crop complex in sorghum: The dynamics of genetic diversity in a traditional farming system.  
604 *Am. J. Bot.* 96, 1869–1879. doi:10.3732/ajb.0800284.
- 605 Barton, N., and Bengtsson, B. O. (1986). The barrier to genetic exchange between hybridising  
606 populations. *Heredity* 57, 357–376. doi:10.1038/hdy.1986.135.
- 607 Barton, N. H., and Hewitt, G. M. (1985). Analysis of hybrid zones. *Annu. Rev. Ecol. Syst.* 16, 113–  
608 148.
- 609 Bredeson, J. V., Lyons, J. B., Prochnik, S. E., Wu, G. A., Ha, C. M., Edsinger-Gonzales, E., et al.  
610 (2016). Sequencing wild and cultivated cassava and related species reveals extensive  
611 interspecific hybridization and genetic diversity. *Nat. Biotechnol.* 34, 562–570.  
612 doi:10.1038/nbt.3535.
- 613 Burgarella, C., Cubry, P., Kane, N. A., Varshney, R. K., Mariac, C., Liu, X., et al. (in press). A  
614 western Sahara origin of African agriculture inferred from pearl millet genomes. *Nat. Ecol.*  
615 *Evol.*
- 616 Burger, J. C., Chapman, M. A., and Burke, J. M. (2008). Molecular insights into the evolution of  
617 crop plants. *Am. J. Bot.* 95, 113–122. doi:10.3732/ajb.95.2.113.
- 618 Castric, V., Bechsgaard, J., Schierup, M. H., and Vekemans, X. (2008). Repeated Adaptive  
619 Introgression at a Gene under Multiallelic Balancing Selection. *PLOS Genet.* 4, e1000168.  
620 doi:10.1371/journal.pgen.1000168.
- 621 Choi, J. Y., Platts, A. E., Fuller, D. Q., Hsing (邢禹依), Y.-I., Wing, R. A., and Purugganan, M. D.  
622 (2017). The Rice Paradox: Multiple Origins but Single Domestication in Asian Rice. *Mol.*  
623 *Biol. Evol.* 34, 969–979. doi:10.1093/molbev/msx049.
- 624 Cornille, A., Gladieux, P., Smulders, M. J. M., Roldán-Ruiz, I., Laurens, F., Cam, B. L., et al.  
625 (2012). New Insight into the History of Domesticated Apple: Secondary Contribution of the  
626 European Wild Apple to the Genome of Cultivated Varieties. *PLOS Genet.* 8, e1002703.  
627 doi:10.1371/journal.pgen.1002703.
- 628 Couturon, E., Bezaçon, G., and Renno, J.-F. (1997). Influence des pratiques culturelles sur  
629 l'évolution de la fréquence des hybrides chibra dans un champ de mil, *Pennisetum glaucum*  
630 (L.) R. Br., au Sahel.
- 631 Couturon, E., Mariac, C., Bezaçon, G., Lauga, J., and Renno, J.-F. (2003). Impact of natural and  
632 human selection on the frequency of the F1 hybrid between cultivated and wild pearl millet  
633 (*Pennisetum glaucum* (L.) R. Br.). *Euphytica* 133, 329–337.
- 634 Coyne, J. A., and Orr, H. A. (2004). *Speciation*. Sunderland, MA. Sinauer Associates, Inc.
- 635 Crimmins, S. M., Dobrowski, S. Z., Greenberg, J. A., Abatzoglou, J. T., and Mynsberge, A. R.  
636 (2011). Changes in climatic water balance drive downhill shifts in plant species' optimum  
637 elevations. *Science* 331, 324–327.
- 638 Crisci, J. L., Poh, Y.-P., Bean, A., Simkin, A., and Jensen, J. D. (2012). Recent Progress in  
639 Polymorphism-Based Population Genetic Inference. *J. Hered.* 103, 287–296.  
640 doi:10.1093/jhered/esr128.



- 641 Crow, J. F. (1958). SOME POSSIBILITIES FOR MEASURING SELECTION INTENSITIES IN  
642 MAN. *Hum. Biol.* 30, 1–13.
- 643 Cruickshank, T. E., and Hahn, M. W. (2014). Reanalysis suggests that genomic islands of  
644 speciation are due to reduced diversity, not reduced gene flow. *Mol. Ecol.* 23, 3133–3157.  
645 doi:10.1111/mec.12796.
- 646 Dannemann, M., Andrés, A. M., and Kelso, J. (2016). Introgression of Neandertal-and Denisovan-  
647 like haplotypes contributes to adaptive variation in human Toll-like receptors. *AJHG*, 98,  
648 22-33.
- 649 de la Cruz, E. P., Gepts, P., GarciaMarín, P. C., and Villareal, D. Z. (2005). Spatial Distribution of  
650 Genetic Diversity in Wild Populations of *Phaseolus vulgaris*L. from Guanajuato and  
651 Michoacán, Méexico. *Genet. Resour. Crop Evol.* 52, 589–599.
- 652 Dempewolf, H., Baute, G., Anderson, J., Kilian, B., Smith, C., and Guarino, L. (2017). Past and  
653 Future Use of Wild Relatives in Crop Breeding. *Crop Sci.* 0.  
654 doi:10.2135/cropsci2016.10.0885.
- 655 Dempewolf, H., Hodgins, K. A., Rummell, S. E., Ellstrand, N. C., and Rieseberg, L. H. (2012).  
656 Reproductive Isolation during Domestication. *Plant Cell* 24, 2710–2717.  
657 doi:10.1105/tpc.112.100115.
- 658 Deschamps, M., Laval, G., Fagny, M., Itan, Y., Abel, L., Casanova, J. L., ... and Quintana-Murci, L.  
659 (2016). Genomic signatures of selective pressures and introgression from archaic hominins  
660 at human innate immunity genes. *AJHG*, 98, 5-21.  
661
- 662 Diez, C. M., Trujillo, I., Martinez-Urdiroz, N., Barranco, D., Rallo, L., Marfil, P., et al. (2015).  
663 Olive domestication and diversification in the Mediterranean Basin. *New Phytol.* 206, 436–  
664 447. doi:10.1111/nph.13181.
- 665 Doebley, J. F., Gaut, B. S., and Smith, B. D. (2006). The Molecular Genetics of Crop  
666 Domestication. *Cell* 127, 1309–1321. doi:10.1016/j.cell.2006.12.006.
- 667 Doi, H., Takahashi, M., and Katano, I. (2010). Genetic diversity increases regional variation in  
668 phenological dates in response to climate change. *Glob. Change Biol.* 16, 373–379.
- 669 Durand, E. Y., Patterson, N., Reich, D., and Slatkin, M. (2011). Testing for Ancient Admixture  
670 between Closely Related Populations. *Mol. Biol. Evol.* 28, 2239–2252.  
671 doi:10.1093/molbev/msr048.
- 672 Ejeta, G., and Grenier, C. (2005). Sorghum and its weedy hybrids. *Crop Feral. Volunt. CRC Press*  
673 *Boca Raton FL*, 123–135.
- 674 Ellstrand, N. C. (2014). Is gene flow the most important evolutionary force in plants? *Am. J. Bot.*  
675 101, 737–753. doi:10.3732/ajb.1400024.
- 676 Ellstrand, N. C., Meirmans, P., Rong, J., Bartsch, D., Ghosh, A., de Jong, T. J., et al. (2013).  
677 Introgression of Crop Alleles into Wild or Weedy Populations. *Annu. Rev. Ecol. Evol. Syst.*  
678 44, 325–345. doi:10.1146/annurev-ecolsys-110512-135840.

- 679 Ellstrand, N. C., and Schierenbeck, K. A. (2000). Hybridization as a stimulus for the evolution of  
680 invasiveness in plants? *Proc. Natl. Acad. Sci.* 97, 7043–7050. doi:10.1073/pnas.97.13.7043.
- 681 Enciso-Romero, J., Pardo-Díaz, C., Martin, S. H., Arias, C. F., Linares, M., McMillan, W. O., et al.  
682 (2017). Evolution of novel mimicry rings facilitated by adaptive introgression in tropical  
683 butterflies. *Mol. Ecol.* 26, 5160–5172. doi:10.1111/mec.14277.
- 684 Fitzpatrick, B. M., Johnson, J. R., Kump, D. K., Shaffer, H. B., Smith, J. J., and Voss, S. R. (2009).  
685 Rapid fixation of non-native alleles revealed by genome-wide SNP analysis of hybrid tiger  
686 salamanders. *BMC Evol. Biol.* 9, 176.  
687
- 688 Fonceka, D., Tossim, H.-A., Rivallan, R., Vignes, H., Lacut, E., Bellis, F. de, et al. (2012).  
689 Construction of Chromosome Segment Substitution Lines in Peanut (*Arachis hypogaea* L.)  
690 Using a Wild Synthetic and QTL Mapping for Plant Morphology. *PLOS ONE* 7, e48642.  
691 doi:10.1371/journal.pone.0048642.
- 692 Frantz, L. A. F., Schraiber, J. G., Madsen, O., Megens, H.-J., Cagan, A., Bosse, M., et al. (2015).  
693 Evidence of long-term gene flow and selection during domestication from analyses of  
694 Eurasian wild and domestic pig genomes. *Nat. Genet.* 47, 1141–1148. doi:10.1038/ng.3394.
- 695 Frichot, E., Mathieu, F., Trouillon, T., Bouchard, G., and François, O. (2014). Fast and Efficient  
696 Estimation of Individual Ancestry Coefficients. *Genetics* 196, 973–983.  
697 doi:10.1534/genetics.113.160572.
- 698 Gagnaire, Albert V., Jónsson B., and Bernatchez L. (2009). Natural selection influences AFLP  
699 intraspecific genetic variability and introgression patterns in Atlantic eels. *Mol. Ecol.* 18,  
700 1678–1691. doi:10.1111/j.1365-294X.2009.04142.x.
- 701 Gittelman, R. M., Schraiber, J. G., Vernot, B., Mikacenic, C., Wurfel, M. M., and Akey, J. M.  
702 (2016). Archaic Hominin Admixture Facilitated Adaptation to Out-of-Africa Environments.  
703 *Curr. Biol.* doi:10.1016/j.cub.2016.10.041.
- 704 Glémin, S., and Bataillon, T. (2009). A comparative view of the evolution of grasses under  
705 domestication. *New Phytol.* 183, 273–290. doi:10.1111/j.1469-8137.2009.02884.x.
- 706 Grant, P. R., and Grant, B. R. (1994). Phenotypic and genetic effects of hybridization in Darwin’s  
707 finches. *Evolution* 48, 297–316.
- 708 Green, R. E., Krause, J., Briggs, A. W., Maricic, T., Stenzel, U., Kircher, M., et al. (2010). A Draft  
709 Sequence of the Neandertal Genome. *Science* 328, 710–722. doi:10.1126/science.1188021.
- 710 Gross, B. L., and Olsen, K. M. (2010). Genetic perspectives on crop domestication. *Trends Plant*  
711 *Sci.* 15, 529–537. doi:10.1016/j.tplants.2010.05.008.
- 712 Guan, Y. (2014). Detecting Structure of Haplotypes and Local Ancestry. *Genetics* 196, 625–642.  
713 doi:10.1534/genetics.113.160697.
- 714 Guarino, L., and Lobell, D. B. (2011). A walk on the wild side. *Nat. Clim. Change* 1, 374–375.  
715 doi:10.1038/nclimate1272.

- 716 Hajjar, R., and Hodgkin, T. (2007). The use of wild relatives in crop improvement: a survey of  
717 developments over the last 20 years. *Euphytica* 156, 1–13. doi:10.1007/s10681-007-9363-0.
- 718 Hedrick, P. W. (2009). Conservation Genetics and North American Bison (*Bison bison*). *J. Hered.*  
719 100, 411–420. doi:10.1093/jhered/esp024.
- 720 Hedrick, P. W. (2013). Adaptive introgression in animals: examples and comparison to new  
721 mutation and standing variation as sources of adaptive variation. *Mol. Ecol.* 22, 4606–4618.  
722 doi:10.1111/mec.12415.
- 723 Hermisson, J., and Pennings, P. S. (2005). Soft sweeps: molecular population genetics of adaptation  
724 from standing genetic variation. *Genetics* 169, 2335–2352.  
725 doi:10.1534/genetics.104.036947.
- 726 Hermisson, J., and Pennings, P. S. (2017). Soft sweeps and beyond: understanding the patterns and  
727 probabilities of selection footprints under rapid adaptation. *Methods Ecol. Evol.* 8, 700–716.  
728 doi:10.1111/2041-210X.12808.
- 729 Hewitt, G. M. (1988). Hybrid zones-natural laboratories for evolutionary studies. *Trends Ecol. Evol.*  
730 3, 158–167. doi:10.1016/0169-5347(88)90033-X.
- 731 Hoffmann, A. A., Sgrò, C. M., and Kristensen, T. N. (2017). Revisiting Adaptive Potential,  
732 Population Size, and Conservation. *Trends Ecol. Evol.* 0. doi:10.1016/j.tree.2017.03.012.
- 733 Hooftman, Jong Maaïke, J. De, Oostermeijer, J. Gerard B, and Den Nijs, Hans (j.) C. M (2007).  
734 Modelling the long-term consequences of crop–wild relative hybridization: a case study  
735 using four generations of hybrids. *J. Appl. Ecol.* 44, 1035–1045. doi:10.1111/j.1365-  
736 2664.2007.01341.x.
- 737 Hohenlohe, P. A., Day, M. D., Amish, S. J., Miller, M. R., Kamps-Hughes, N., Boyer, M. C., ... and  
738 Luikart, G. (2013). Genomic patterns of introgression in rainbow and westslope cutthroat  
739 trout illuminated by overlapping paired-end RAD sequencing. *Mol. Ecol.* 22, 3002-3013.  
740
- 741 Hsieh, P., Woerner, A. E., Wall, J. D., Lachance, J., Tishkoff, S. A., Gutenkunst, R. N., et al.  
742 (2016). Model-based analyses of whole-genome data reveal a complex evolutionary history  
743 involving archaic introgression in Central African Pygmies. *Genome Res.* 26, 291–300.  
744 doi:10.1101/gr.196634.115.
- 745 Huang, X., Kurata, N., Wei, X., Wang, Z.-X., Wang, A., Zhao, Q., et al. (2012). A map of rice  
746 genome variation reveals the origin of cultivated rice. *Nature* 490, 497–501.  
747 doi:10.1038/nature11532.
- 748 Huerta-Sánchez, E., Jin, X., Asan, Bianba, Z., Peter, B. M., Vinckenbosch, N., et al. (2014).  
749 Altitude adaptation in Tibetans caused by introgression of Denisovan-like DNA. *Nature*  
750 512, 194–197. doi:10.1038/nature13408.
- 751 Hufford, M. B., Lubinsky, P., Pyhäjärvi, T., Devengenzo, M. T., Ellstrand, N. C., and Ross-Ibarra,  
752 J. (2013). The Genomic Signature of Crop-Wild Introgression in Maize. *PLoS Genet* 9,  
753 e1003477. doi:10.1371/journal.pgen.1003477.

- 754 IPCC (2014). “Climate Change 2014: Impacts, Adaptation, and Vulnerability. Part A: Global and  
755 Sectoral Aspects. Contribution of Working Group II to the Fifth Assessment Report of the  
756 Intergovernmental Panel on Climate Change.” in (Cambridge, United Kingdom and New  
757 York, NY, USA: Field, C.B., Barros, V.R., Dokken, D.J., Mach, K.J., Mastrandrea, M.D.,  
758 Bilir, T.E., Chatterjee, M., Ebi, K.L., Estrada, Y.O., Genova, R.C., Girma, B., Kissel, E.S.,  
759 Levy, A.N., MacCracken, S., Mastrandrea, P.R., White, L.L. (Eds.)), 1132.
- 760 Jarvis, D. I., and Hodgkin, T. (1999). Wild relatives and crop cultivars: detecting natural  
761 introgression and farmer selection of new genetic combinations in agroecosystems. *Mol.*  
762 *Ecol.* 8.
- 763 Jeong, C., and Di Rienzo, A. (2014). Adaptations to local environments in modern human  
764 populations. *Curr. Opin. Genet. Dev.*, 29, 1-8.  
765
- 766 Jombart, T., Pontier, D., and Dufour, A.-B. (2009). Genetic markers in the playground of  
767 multivariate analysis. *Heredity* 102, 330–341.
- 768 Kim, M., Cui, M.-L., Cubas, P., Gillies, A., Lee, K., Chapman, M. A., et al. (2008). Regulatory  
769 Genes Control a Key Morphological and Ecological Trait Transferred Between Species.  
770 *Science* 322, 1116–1119. doi:10.1126/science.1164371.
- 771 Kovach, M. J., Calingacion, M. N., Fitzgerald, M. A., and McCouch, S. R. (2009). The origin and  
772 evolution of fragrance in rice (*Oryza sativa* L.). *Proc. Natl. Acad. Sci.* 106, 14444–14449.  
773 doi:10.1073/pnas.0904077106.
- 774 Kulathinal, R. J., Stevison, L. S., and Noor, M. A. F. (2009). The Genomics of Speciation in  
775 *Drosophila*: Diversity, Divergence, and Introgression Estimated Using Low-Coverage  
776 Genome Sequencing. *PLOS Genet.* 5, e1000550. doi:10.1371/journal.pgen.1000550.
- 777 Lin, T., Zhu, G., Zhang, J., Xu, X., Yu, Q., Zheng, Z., et al. (2014). Genomic analyses provide  
778 insights into the history of tomato breeding. *Nat. Genet.* 46, 1220–1226.  
779 doi:10.1038/ng.3117.
- 780 Liu, K. J., Steinberg, E., Yozzo, A., Song, Y., Kohn, M. H., and Nakhleh, L. (2015). Interspecific  
781 introgressive origin of genomic diversity in the house mouse. *Proc. Natl. Acad. Sci.* 112,  
782 196–201. doi:10.1073/pnas.1406298111.
- 783 Llopart, A., Herrig, D., Brud, E., and Stecklein, Z. (2014). Sequential adaptive introgression of the  
784 mitochondrial genome in *Drosophila yakuba* and *Drosophila santomea*. *Mol. Ecol.* 23, 1124-  
785 1136.  
786
- 787 Loarie, S. R., Duffy, P. B., Hamilton, H., Asner, G. P., Field, C. B., and Ackerly, D. D. (2009). The  
788 velocity of climate change. *Nature* 462, 1052–1055. doi:10.1038/nature08649.
- 789 Lobell, D. B., Schlenker, W., and Costa-Roberts, J. (2011). Climate trends and global crop  
790 production since 1980. *Science* 333, 616–620.
- 791 Lowry, D. B., Modliszewski, J. L., Wright, K. M., Wu, C. A., and Willis, J. H. (2008). The strength  
792 and genetic basis of reproductive isolating barriers in flowering plants. *Philos. Trans. R.*  
793 *Soc. B Biol. Sci.* 363, 3009–3021.

- 794 Lu, J., Tang, T., Tang, H., Huang, J., Shi, S., and Wu, C.-I. (2006). The accumulation of deleterious  
795 mutations in rice genomes: a hypothesis on the cost of domestication. *Trends Genet.* 22,  
796 126–131. doi:10.1016/j.tig.2006.01.004.
- 797 Lynd, A., Weetman, D., Barbosa, S., Egyir Yawson, A., Mitchell, S., Pinto, J., et al. (2010). Field,  
798 Genetic, and Modeling Approaches Show Strong Positive Selection Acting upon an  
799 Insecticide Resistance Mutation in *Anopheles gambiae* s.s. *Mol. Biol. Evol.* 27, 1117–1125.  
800 doi:10.1093/molbev/msq002.
- 801 Mallet, J. (2005). Hybridization as an invasion of the genome. *Trends Ecol. Evol.* 20, 229–237.  
802 doi:10.1016/j.tree.2005.02.010.
- 803 Mallet, J. (2007). Hybrid speciation. *Nature* 446, 279–283. doi:10.1038/nature05706.
- 804 Mariac, C., Robert, T., Allinne, C., Remigereau, M. S., Luxereau, A., Tidjani, M., et al. (2006).  
805 Genetic diversity and gene flow among pearl millet crop/weed complex: a case study.  
806 *Theor. Appl. Genet.* 113, 1003–1014. doi:10.1007/s00122-006-0360-9.
- 807 Marsden, C. D., Vecchyo, D. O.-D., O'Brien, D. P., Taylor, J. F., Ramirez, O., Vilà, C., et al.  
808 (2016). Bottlenecks and selective sweeps during domestication have increased deleterious  
809 genetic variation in dogs. *Proc. Natl. Acad. Sci.* 113, 152–157.  
810 doi:10.1073/pnas.1512501113.
- 811 Martin, N. H., Bouck, A. C., and Arnold, M. L. (2006). Detecting Adaptive Trait Introgression  
812 Between *Iris fulva* and *I. brevicaulis* in Highly Selective Field Conditions. *Genetics* 172,  
813 2481–2489. doi:10.1534/genetics.105.053538.
- 814 Martin, S. H., Davey, J. W., and Jiggins, C. D. (2015). Evaluating the Use of ABBA–BABA  
815 Statistics to Locate Introgressed Loci. *Mol. Biol. Evol.* 32, 244–257.  
816 doi:10.1093/molbev/msu269.
- 817 Matsuoka, Y., Vigouroux, Y., Goodman, M. M., Sanchez G., J., Buckler, E., and Doebley, J.  
818 (2002). A single domestication for maize shown by multilocus microsatellite genotyping.  
819 *Proc. Natl. Acad. Sci.* 99, 6080–6084. doi:10.1073/pnas.052125199.
- 820 Meyer, R. S., DuVal, A. E., and Jensen, H. R. (2012). Patterns and processes in crop domestication:  
821 an historical review and quantitative analysis of 203 global food crops. *New Phytol.* 196,  
822 29–48. doi:10.1111/j.1469-8137.2012.04253.x.
- 823 Meyer, R. S., and Purugganan, M. D. (2013). Evolution of crop species: genetics of domestication  
824 and diversification. *Nat. Rev. Genet.* 14, 840–852. doi:10.1038/nrg3605.
- 825 Miao, B., Wang, Z., and Li, Y. (2016). Genomic Analysis Reveals Hypoxia Adaptation in the  
826 Tibetan Mastiff by Introgression of the Grey Wolf from the Tibetan Plateau. *Mol. Biol.*  
827 *Evol.*, msw274. doi:10.1093/molbev/msw274.
- 828 Nevo, E. (2012). “Evolution Canyon,” a potential microscale monitor of global warming across life.  
829 *Proc. Natl. Acad. Sci.* 109, 2960–2965. doi:10.1073/pnas.1120633109.
- 830 Nice, L. M., Steffenson, B. J., Brown-Guedira, G. L., Akhunov, E. D., Liu, C., Kono, T. J. Y., et al.  
831 (2016). Development and Genetic Characterization of an Advanced Backcross-Nested

- 832 Association Mapping (AB-NAM) Population of Wild × Cultivated Barley. *Genetics* 203,  
833 1453–1467. doi:10.1534/genetics.116.190736.
- 834 Norris, L. C., Main, B. J., Lee, Y., Collier, T. C., Fofana, A., Cornel, A. J., et al. (2015). Adaptive  
835 introgression in an African malaria mosquito coincident with the increased usage of  
836 insecticide-treated bed nets. *Proc. Natl. Acad. Sci.* 112, 815–820.  
837 doi:10.1073/pnas.1418892112.
- 838 Olsen, K. M., and Purugganan, M. D. (2002). Molecular Evidence on the Origin and Evolution of  
839 Glutinous Rice. *Genetics* 162, 941–950.
- 840 Pankin, A., and von Korff, M. (2017). Co-evolution of methods and thoughts in cereal  
841 domestication studies: a tale of barley (*Hordeum vulgare*). *Curr. Opin. Plant Biol.* 36, 15–  
842 21. doi:10.1016/j.pbi.2016.12.001.
- 843 Pardo-Diaz, C., Salazar, C., Baxter, S. W., Merot, C., Figueiredo-Ready, W., Joron, M., ... and  
844 Jiggins, C. D. (2012). Adaptive introgression across species boundaries in *Heliconius*  
845 butterflies. *PLoS Genet.* 8, e1002752.  
846
- 847 Parmesan, C., and Yohe, G. (2003). A globally coherent fingerprint of climate change impacts  
848 across natural systems. *Nature* 421, 37–42. doi:10.1038/nature01286.
- 849 Patterson, N., Moorjani, P., Luo, Y., Mallick, S., Rohland, N., Zhan, Y., et al. (2012). Ancient  
850 admixture in human history., Ancient Admixture in Human History. *Genet. Genet.* 192, 192,  
851 1065, 1065–1093. doi:10.1534/genetics.112.145037, 10.1534/genetics.112.145037.
- 852 Pavlidis, P., and Alachiotis, N. (2017). A survey of methods and tools to detect recent and strong  
853 positive selection. *J. Biol. Res.-Thessalon.* 24, 7. doi:10.1186/s40709-017-0064-0.
- 854 Perring, M. P., Frenne, P. D., Baeten, L., Maes, S. L., Depauw, L., Blondeel, H., et al. (2015).  
855 Global environmental change effects on ecosystems: the importance of land-use legacies.  
856 *Glob. Change Biol.* 22, 1361–1371. doi:10.1111/gcb.13146.
- 857 Peter, B. M. (2016). Admixture, Population Structure, and F-Statistics. *Genetics* 202, 1485–1501.  
858 doi:10.1534/genetics.115.183913.
- 859 Pinho, C., and Hey, J. (2010). Divergence with Gene Flow: Models and Data. *Annu. Rev. Ecol.*  
860 *Evol. Syst.* 41, 215–230. doi:10.1146/annurev-ecolsys-102209-144644.
- 861 Poets, A. M., Fang, Z., Clegg, M. T., and Morrell, P. L. (2015). Barley landraces are characterized  
862 by geographically heterogeneous genomic origins. *Genome Biol.* 16, 173.  
863 doi:10.1186/s13059-015-0712-3.
- 864 Pritchard, J. K., Stephens, M., and Donnelly, P. (2000). Inference of population structure using  
865 multilocus genotype data. *Genetics* 155, 945–959.
- 866 Quach, H., Rotival, M., Pothlichet, J., Loh, Y.-H. E., Dannemann, M., Zidane, N., et al. (2016).  
867 Genetic Adaptation and Neandertal Admixture Shaped the Immune System of Human  
868 Populations. *Cell* 167, 643-656.e17. doi:10.1016/j.cell.2016.09.024.

- 869 Racimo, F., Marnetto, D., and Huerta-Sánchez, E. (2017). Signatures of Archaic Adaptive  
870 Introgression in Present-Day Human Populations. *Mol. Biol. Evol.* 34, 296–317.  
871 doi:10.1093/molbev/msw216.
- 872 Racimo, F., Sankararaman, S., Nielsen, R., and Huerta-Sánchez, E. (2015). Evidence for archaic  
873 adaptive introgression in humans. *Nat. Rev. Genet.* 16, 359–371. doi:10.1038/nrg3936.
- 874 Reich, D., Patterson, N., Campbell, D., Tandon, A., Mazieres, S., Ray, N., et al. (2012).  
875 Reconstructing Native American population history. *Nature* 488, 370–374.  
876 doi:10.1038/nature11258.
- 877 Reich, D., Thangaraj, K., Patterson, N., Price, A. L., and Singh, L. (2009). Reconstructing Indian  
878 population history. *Nature* 461, 489–494. doi:10.1038/nature08365.
- 879 Renaut, S., and Rieseberg, L. H. (2015). The Accumulation of Deleterious Mutations as a  
880 Consequence of Domestication and Improvement in Sunflowers and Other Compositae  
881 Crops. *Mol. Biol. Evol.* 32, 2273–2283. doi:10.1093/molbev/msv106.
- 882 Rieseberg, L. H., and Wendel, J. F. (1993). Introgression and its consequences in plants. *Hybrid  
883 Zones Evol. Process*, 70–109.
- 884 Robert, T., Luxereau, A., Mariac, C., Ali, K., Allinne, C., Beidari, Y., et al. (2003). Gestion de la  
885 diversité en milieu paysan: influence de facteurs anthropiques et des flux de gènes sur la  
886 variabilité génétique des formes cultivées et spontanées du mil (*Pennisetum glaucum* ssp.  
887 *glaucum* et ssp. *monodii* dans deux localités du Niger.
- 888 Rochus, C. M., Tortereau, F., Plisson-Petit, F., Restoux, G., Moreno-Romieux, C., Tosser-Klopp,  
889 G., et al. (2017). High density genome scan for selection signatures in French sheep reveals  
890 allelic heterogeneity and introgression at adaptive loci. *bioRxiv*, 103010.  
891 doi:10.1101/103010.
- 892 Rose, C. W., Millwood, R. J., Moon, H. S., Rao, M. R., Halfhill, M. D., Raymer, P. L., et al. (2009).  
893 Genetic load and transgenic mitigating genes in transgenic *Brassica rapa* (field mustard) ×  
894 *Brassica napus* (oilseed rape) hybrid populations. *BMC Biotechnol.* 9, 93. doi:10.1186/1472-  
895 6750-9-93.
- 896 Sams, A. J., Dumaine, A., Nédélec, Y., Yotova, V., Alfieri, C., Tanner, J. E., ... and Barreiro, L. B.  
897 (2016). Adaptively introgressed Neandertal haplotype at the OAS locus functionally impacts  
898 innate immune responses in humans. *Genome Biol.* 17, 246.
- 899 Sankararaman, S., Mallick, S., Dannemann, M., Prüfer, K., Kelso, J., Pääbo, S., et al. (2014). The  
900 genomic landscape of Neanderthal ancestry in present-day humans. *Nature* 507, 354–357.  
901 doi:10.1038/nature12961.
- 902 Scarcelli, N., Tostain, S., Vigouroux, Y., Agbangla, C., Daïnou, O., and Pham, J.-L. (2006).  
903 Farmers' use of wild relative and sexual reproduction in a vegetatively propagated crop. The  
904 case of yam in Benin. *Mol. Ecol.* 15, 2421–2431. doi:10.1111/j.1365-294X.2006.02958.x.
- 905 Scascitelli, M., Whitney, K. D., Randell, R. A., King, M., Buerkle, C. A., and Rieseberg, L. H.  
906 (2010). Genome scan of hybridizing sunflowers from Texas (*Helianthus annuus* and *H.*  
907 *debilis*) reveals asymmetric patterns of introgression and small islands of genomic  
908 differentiation. *Mol. Ecol.* 19, 521–541. doi:10.1111/j.1365-294X.2009.04504.x.

- 909 Schaefer, N. K., Shapiro, B., and Green, R. E. (2016). Detecting hybridization using ancient DNA.  
910 *Mol. Ecol.*, n/a-n/a. doi:10.1111/mec.13556.
- 911 Schubert, M., Jónsson, H., Chang, D., Sarkissian, C. D., Ermini, L., Ginolhac, A., et al. (2014).  
912 Prehistoric genomes reveal the genetic foundation and cost of horse domestication. *Proc.*  
913 *Natl. Acad. Sci.* 111, E5661–E5669. doi:10.1073/pnas.1416991111.
- 914 Shibata, H., Branquinho, C., McDowell, W. H., Mitchell, M. J., Monteith, D. T., Tang, J., et al.  
915 (2015). Consequence of altered nitrogen cycles in the coupled human and ecological system  
916 under changing climate: The need for long-term and site-based research. *AMBIO* 44, 178–  
917 193. doi:10.1007/s13280-014-0545-4.
- 918 Smith, J. M., and Haigh, J. (1974). The hitch-hiking effect of a favourable gene. *Genet. Res.* 23, 23–  
919 35. doi:10.1017/S0016672300014634.
- 920 Smith, M. W., Patterson, N., Lautenberger, J. A., Truelove, A. L., McDonald, G. J., Waliszewska,  
921 A., et al. (2004). A High-Density Admixture Map for Disease Gene Discovery in African  
922 Americans. *Am. J. Hum. Genet.* 74, 1001–1013. doi:10.1086/420856.
- 923 Song, Y., Endepols, S., Klemann, N., Richter, D., Matuschka, F.-R., Shih, C.-H., et al. (2011).  
924 Adaptive Introgression of Anticoagulant Rodent Poison Resistance by Hybridization  
925 between Old World Mice. *Curr. Biol.* 21, 1296–1301. doi:10.1016/j.cub.2011.06.043.
- 926 Song, Y. S., and Hein, J. (2005). Constructing Minimal Ancestral Recombination Graphs. *J.*  
927 *Comput. Biol.* 12, 147–169. doi:10.1089/cmb.2005.12.147.
- 928 Staubach, F., Lorenc, A., Messer, P. W., Tang, K., Petrov, D. A., and Tautz, D. (2012). Genome  
929 Patterns of Selection and Introgression of Haplotypes in Natural Populations of the House  
930 Mouse (*Mus musculus*). *PLoS Genet.* 8, e1002891. doi:10.1371/journal.pgen.1002891.
- 931 Suarez-Gonzalez, A., Lexer, C., and Cronk, Q. C. B. (2018). Adaptive introgression: a plant  
932 perspective. *Biol. Lett.* 14, 20170688. doi:10.1098/rsbl.2017.0688.
- 933 Turissini, D. A., and Matute, D. R. (2017). Fine scale mapping of genomic introgressions within the  
934 *Drosophila yakuba* clade. *PLOS Genet.* 13, e1006971. doi:10.1371/journal.pgen.1006971.
- 935 Uwimana, B., D'andrea, L., Felber, F., Hooftman, D. a. P., Nijs, H. C. M. D., Smulders, M. J. M., et  
936 al. (2012). A Bayesian analysis of gene flow from crops to their wild relatives: cultivated  
937 (*Lactuca sativa* L.) and prickly lettuce (*L. serriola* L.) and the recent expansion of *L. serriola*  
938 in Europe. *Mol. Ecol.* 21, 2640–2654. doi:10.1111/j.1365-294X.2012.05489.x.
- 939 Vernot, B., and Akey, J. M. (2014). Human Evolution: Genomic Gifts from Archaic Hominins.  
940 *Curr. Biol.* 24, R845–R848. doi:10.1016/j.cub.2014.07.079.
- 941 Vernot, B., Tucci, S., Kelso, J., Schraiber, J. G., Wolf, A. B., Gittelman, R. M., et al. (2016).  
942 Excavating Neandertal and Denisovan DNA from the genomes of Melanesian individuals.  
943 *Science*, aad9416. doi:10.1126/science.aad9416.
- 944 Vigouroux, Y., Mariac, C., Mita, S. D., Pham, J.-L., Gérard, B., Kapran, I., et al. (2011). Selection  
945 for Earlier Flowering Crop Associated with Climatic Variations in the Sahel. *PLOS ONE* 6,  
946 e19563. doi:10.1371/journal.pone.0019563.



- 947 von Holdt, B. M., Kays, R. W., Pollinger, J. P., and Wayne, R. K. (2016). Admixture mapping  
948 identifies introgressed genomic regions in North American canids. *Mol. Ecol.*, n/a-n/a.  
949 doi:10.1111/mec.13667.
- 950 Walther, G.-R., Post, E., Convey, P., Menzel, A., Parmesan, C., Beebee, T. J. C., et al. (2002).  
951 Ecological responses to recent climate change. *Nature* 416, 389–395. doi:10.1038/416389a.
- 952 Wang, L., Beissinger, T. M., Lorant, A., Ross-Ibarra, C., Ross-Ibarra, J., and Hufford, M. (2017).  
953 The interplay of demography and selection during maize domestication and expansion.  
954 *bioRxiv*, 114579. doi:10.1101/114579.
- 955 Warschefsky, E., Penmetsa, R. V., Cook, D. R., and Wettberg, E. J. B. von (2014). Back to the  
956 wilds: Tapping evolutionary adaptations for resilient crops through systematic hybridization  
957 with crop wild relatives. *Am. J. Bot.* 101, 1791–1800. doi:10.3732/ajb.1400116.
- 958 Weetman, D., Wilding, C. S., Steen, K., Morgan, J. C., Simard, F., and Donnelly, M. J. (2010).  
959 Association Mapping of Insecticide Resistance in Wild *Anopheles gambiae* Populations:  
960 Major Variants Identified in a Low-Linkage Disequilibrium Genome. *PLOS ONE* 5, e13140.  
961 doi:10.1371/journal.pone.0013140.
- 962 Weill, M., Chandre, F., Brengues, C., Manguin, S., Akogbeto, M., Pasteur, N., et al. (2000). The *kdr*  
963 mutation occurs in the Mopti form of *Anopheles gambiae* s. through introgression. *Insect*  
964 *Mol. Biol.* 9, 451–455.
- 965 Whitney, K. D., Broman, K. W., Kane, N. C., Hovick, S. M., Randell, R. A., and Rieseberg, L. H.  
966 (2015). Quantitative trait locus mapping identifies candidate alleles involved in adaptive  
967 introgression and range expansion in a wild sunflower. *Mol. Ecol.* 24, 2194–2211.  
968 doi:10.1111/mec.13044.
- 969 Whitney, K. D., Randell, R. A., and Rieseberg, L. H. (2010). Adaptive introgression of abiotic  
970 tolerance traits in the sunflower *Helianthus annuus*. *New Phytol.* 187, 230–239.  
971 doi:10.1111/j.1469-8137.2010.03234.x.
- 972 Whitney, K. D., Randell, R. A., Rieseberg, L. H., Elle, A. E. E., and Whitlock, E. M. C. (2006).  
973 Adaptive Introgression of Herbivore Resistance Traits in the Weedy Sunflower *Helianthus*  
974 *annuus*. *Am. Nat.* 167, 794–807. doi:10.1086/504606.
- 975 Wolf, D. E., Takebayashi, N., and Rieseberg, L. H. (2001). Predicting the Risk of Extinction  
976 through Hybridization. *Conserv. Biol.* 15, 1039–1053. doi:10.1046/j.1523-  
977 1739.2001.0150041039.x.
- 978 Wright, S. (1931). Evolution in Mendelian Populations. *Genetics* 16, 97–159.
- 979 Zhang, W., Fan, Z., Han, E., Hou, R., Zhang, L., Galaverni, M., et al. (2014). Hypoxia Adaptations  
980 in the Grey Wolf (*Canis lupus chanco*) from Qinghai-Tibet Plateau. *PLOS Genet.* 10,  
981 e1004466. doi:10.1371/journal.pgen.1004466.
- 982 Zheng, P., Allen, W. B., Roesler, K., Williams, M. E., Zhang, S., Li, J., et al. (2008). A  
983 phenylalanine in DGAT is a key determinant of oil content and composition in maize. *Nat.*  
984 *Genet.* 40, 367–372. doi:10.1038/ng.85.

- 985 Zhou, Q., Zhao, L., and Guan, Y. (2016). Strong Selection at MHC in Mexicans since Admixture.  
986 *PLoS Genet* 12, e1005847. doi:10.1371/journal.pgen.1005847.
- 987 Zhu, Y., Li, W., Yang, B., Zhang, Z., Ai, H., Ren, J., and Huang, L. (2017). Signatures of selection  
988 and interspecies introgression in the genome of Chinese domestic pigs. *GBE* 9, 2592-2603.  
989
- 990 Zizumbo-Villarreal, D., Colunga-GarcíaMarín, P., de la Cruz, E. P., Delgado-Valerio, P., and  
991 Gepts, P. (2005). Population structure and evolutionary dynamics of wild–weedy–  
992 domesticated complexes of common bean in a Mesoamerican region. *Crop Sci.* 45, 1073–  
993 1083.
- 994  
995

96  
97  
98  
99  
00

**Table 1. Summary of studies reviewed.** Species names for donor and recipient taxa are listed, as well as the type of data and methods used for 1) detection of the introgression and 2) detection of the selection. “Genomic data” term include s whole-genome sequences or candidates genes sequencing. “Genetic data” refers to molecular markers such as QTL or SSR.

| Group  | Donor                               | Recipient                    | Data                        | Method for detection of Introgression           | Method for detection of Selection                                       | Adaptive trait                       | Publication               |
|--------|-------------------------------------|------------------------------|-----------------------------|-------------------------------------------------|-------------------------------------------------------------------------|--------------------------------------|---------------------------|
| Animal | <i>Anopheles gambiae</i>            | <i>A. coluzzi</i>            | Genomic data                | Diagnostic alleles                              | Haplotype based test; Test for temporal evolution of allele frequencies | Pesticide resistance                 | Lynd et al. (2010)        |
| Animal | <i>Anopheles gambiae</i>            | <i>A. coluzzi</i>            | Genomic data                | Diagnostic alleles                              | Differentiation approach; Diversity statistics                          | Pesticide resistance                 | Norris et al. (2014)      |
| Animal | <i>Drosophila yakuba</i>            | <i>D. santomea</i>           | Genomic data (mtDNA)        | Genes genealogy; Isolation with Migration model | Coalescent simulations                                                  | na                                   | Llopart et al. (2014)     |
| Animal | <i>Mus spretus</i>                  | <i>M. m. domesticus</i>      | Genomic and phenotypic data | Genes genealogy; Hudson-Kreitman-Aguade test    | Differentiation approach; Fitness measures                              | Pesticide resistance                 | Song et al. (2011)        |
| Animal | <i>Mus spretus</i>                  | <i>M. m. domesticus</i>      | Genomic data                | Genes genealogy                                 | XP-CLR                                                                  | Pesticide resistance                 | Liu et al. (2015)         |
| Animal | <i>Mus musculus musculus</i>        | <i>M. m. domesticus</i>      | Genomic data                | Local ancestry inference                        | XP-CLR; Differentiation approach; Coalescent simulations                | Genetic disease, alpha-amylase genes | Staubach et al. (2012)    |
| Animal | <i>Onchorhynchus mykiss</i>         | <i>O. clarkii lewisi</i>     | Genomic data                | Diagnostic alleles                              | Heterogeneity test of Long (1991)                                       | Fecondity                            | Hohenlohe et al. (2013)   |
| Animal | <i>Ambystoma tigrinum mavortium</i> | <i>A. californiense</i>      | Genomic data                | Diagnostic alleles                              | Heterogeneity test of Long (1991)                                       | na                                   | Fitzpatrick et al. (2009) |
| Animal | <i>Sus sp.</i>                      | <i>Sus scrofa domesticus</i> | Genomic data                | Genes genealogy                                 | Differentiation approach                                                | Highland adaptation                  | Ai et al. (2015)          |
| Animal | <i>Sus celebensis</i>               | <i>Sus scrofa domesticus</i> | Genomic data                | Genes genealogy; Differentiation statistics     | Differentiation approach                                                | Aggressive behaviour                 | Zhu et al. (2017)         |
| Animal | <i>Canis lupus familiaris</i>       | <i>C. lupus lupus</i>        | Genomic data                | Genes genealogy                                 | Haplotype based test                                                    | Concealment during predation         | Anderson et al. (2009)    |
| Animal | <i>C. lupus lupus</i>               | <i>C. l. familiaris</i>      | Genomic data                | D statistic                                     | Haplotype based test; Differentiation outlier approach                  | Highland adaptation                  | Miao et al. (2016)        |
| Animal | <i>Ovis aries</i>                   | <i>Ovis aries</i> \$         | Genomic data                | Local ancestry inference; Populations genealogy | Differentiation outlier approach                                        | na                                   | Rochus et al. (2017)      |
| Animal | <i>Anguilla rostrata</i>            | <i>A. anguilla</i>           | Genomic data                | Local ancestry inference                        | Differentiation outlier approach; Allele frequencies outlier test       | na                                   | Gagnaire et al. (2009)    |

|        |                                                  |                       |                             |                                                                                    |                                                                                        |                                                            |                              |
|--------|--------------------------------------------------|-----------------------|-----------------------------|------------------------------------------------------------------------------------|----------------------------------------------------------------------------------------|------------------------------------------------------------|------------------------------|
| Animal | <i>Heliconious melpomene</i>                     | <i>H. cydno clade</i> | Genomic data                | Genes genealogy; Isolation with Migration model, Linkage Disequilibrium analysis   | Not addressed, but trait previously tested as under natural selection                  | Wing pattern                                               | Pardo-Diaz et al. (2017)     |
| Animal | <i>Heliconious melpomene</i>                     | <i>H. beskei</i>      | Genomic data                | Gene genealogy; D-statistic and <i>f</i> -statistics                               | Not addressed, but trait previously tested as under natural selection                  | Wing pattern                                               | Zhang et al. (2016)          |
| Human  | <i>Homo s. denisovans</i>                        | <i>H. s. sapiens</i>  | Genomic data                | D statistic, S* statistic                                                          | Differentiation outlier approach                                                       | Highland adaptation                                        | Huerta Sanchez et al. (2014) |
| Human  | <i>Homo s. neandertalensis, H. s. denisovans</i> | <i>H. s. sapiens</i>  | Genomic and expression data | Diagnostic alleles                                                                 | McDonald-Kreitman test; Haplotype based test; Differentiation outlier approach         | Immune response                                            | Deschamp et al. (2016)       |
| Human  | <i>Homo neandertalensis, H. s. denisovans</i>    | <i>H. s. sapiens</i>  | Genomic and expression data | Differentiation comparisons; Haplotype length vs. ILS (Incomplete Lineage Sorting) | Differentiation outlier approach; Gene expression; Genotype-Phenotype association      | Immune response                                            | Danneman et al. (2016)       |
| Human  | <i>Homo neandertalensis, H. s. denisovans</i>    | <i>H. s. sapiens</i>  | Genomic data                | <i>f</i> statistics, S* statistic                                                  | Coalescent simulations                                                                 | Immune response and metabolism                             | Vernot et al. (2016)         |
| Human  | <i>Homo neandertalensis, H. s. denisovans</i>    | <i>H. s. sapiens</i>  | Genomic data                | Diagnostic alleles                                                                 | Coalescent simulations                                                                 | Immune response, defense, regulatory regions, pigmentation | Gittelman et al. (2016)      |
| Human  | <i>Homo s. neandertalensis</i>                   | <i>H. s. sapiens</i>  | Genomic data                | Genes genealogy                                                                    | Allele frequencies outlier test                                                        | Immune response                                            | Mendez et al. (2012)         |
| Human  | <i>Homo s. neandertalensis</i>                   | <i>H. s. sapiens</i>  | Genomic data                | Diagnostic alleles                                                                 | Coalescent simulations; Haplotype based test                                           | Immune response                                            | Sams et al. (2016)           |
| Human  | <i>Homo s. neandertalensis</i>                   | <i>H. s. sapiens</i>  | Genomic data                | Diagnostic alleles                                                                 | Differentiation outlier approach; Haplotype based test; XP-CLR; Coalescent simulations | Immune response                                            | Quach et al. (2016)          |
| Human  | <i>H. s. sapiens</i>                             | <i>H. s. sapiens</i>  | Genomic data                | Population genealogy; D statistic and <i>f</i> statistics                          | Allele frequencies outlier test                                                        | Highland adaptation                                        | Jeong et al. (2014)          |
| Plant  | <i>Arabidopsis lyrata</i>                        | <i>A. arenosa</i>     | Genomic data                | <i>f</i> statistics                                                                | Differentiation outlier approach                                                       | Serpentine syndrome                                        | Arnold et al. (2016)         |
| Plant  | <i>Helianthus debilis</i>                        | <i>H. annuus</i>      | Phenotypic data             | Experimental hybrid populations                                                    | Common garden experiments - Fitness measures                                           | Herbivory, drought                                         | Whitney et al. (2006, 2010)  |
| Plant  | <i>Helianthus debilis</i>                        | <i>H. annuus</i>      | Genomic and phenotypic      | Experimental hybrid populations                                                    | Genotype-Phenotype association -                                                       | Number of seeds and pollen export                          | Whitney et al. (2015)        |

|       |                              |                            | data                                    |                                                             | Fitness measures                                     |                             |                               |
|-------|------------------------------|----------------------------|-----------------------------------------|-------------------------------------------------------------|------------------------------------------------------|-----------------------------|-------------------------------|
| Plant | <i>Iris fulva</i>            | <i>I. brevicaulis</i>      | Genomic and phenotypic data             | Experimental hybrid populations                             | Genotype-Phenotype association - Fitness measures    | Flood tolerance             | Martin et al. (2006)          |
| Plant | <i>Populus balsamifera</i>   | <i>P. trichocarpa</i>      | Genomic, expression and phenotypic data | Local ancestry inference                                    | Diversity statistics; Genotype-Phenotype association | Light response              | Suarez-Gonzalez et al. (2016) |
| Plant | <i>Zea mays mexicana</i>     | <i>Z. m. mays</i>          | Genomic data                            | Local ancestry inference                                    | Genotype-Environment association                     | Highland adaptation         | Hufford et al. (2013)         |
| Plant | <i>Oryza sativa japonica</i> | <i>Oryza sativa indica</i> | Genomic data                            | Diagnostic alleles                                          | Haplotype based test                                 | Fragrance                   | Kovach et al. (2009)          |
| Plant | <i>Senecio squalidus</i>     | <i>S. vulgaris</i>         | Genomic data                            | Diagnostic alleles                                          | not adressed but strongly suggested                  | Flower asymmetry            | Kim et al. (2008)             |
| Plant | <i>Arabidopsis halleri</i>   | <i>A. lyrata</i>           | Genomic data                            | Differentiation comparisons; Isolation with Migration model | not adressed but strongly suggested                  | Pistil self-incompatibility | Castric et al. (2008)         |

01  
02  
03  
04

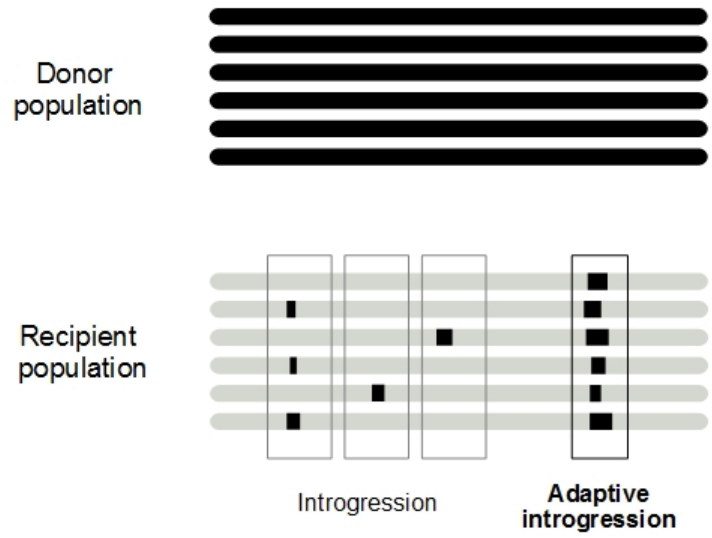

**Figure 1**

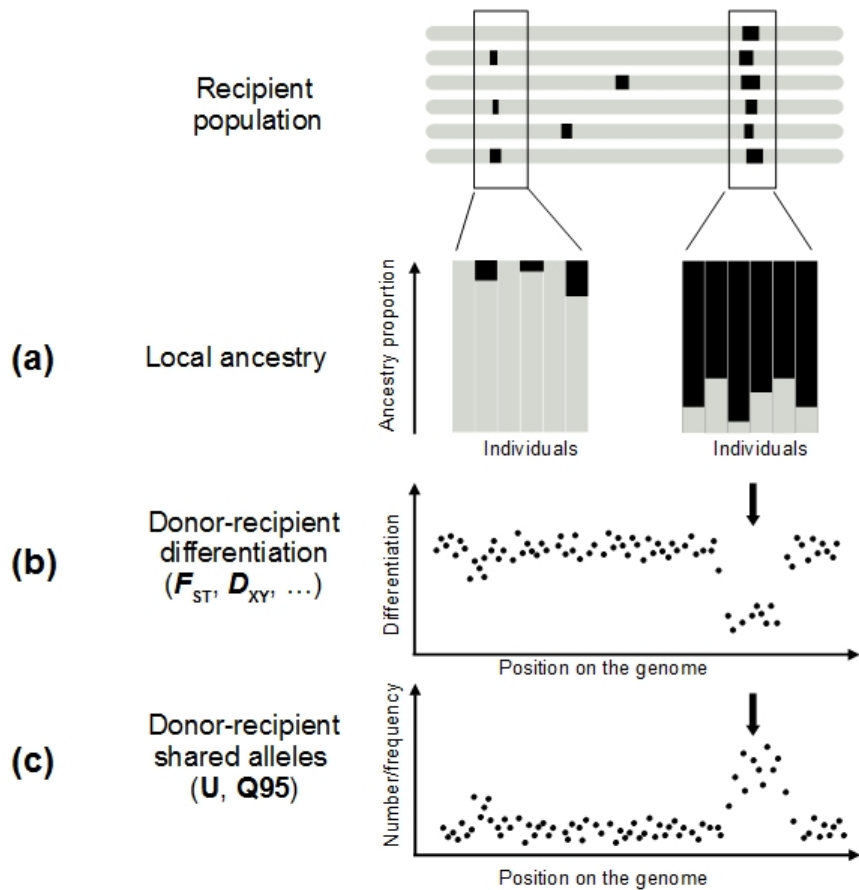

**Figure 2**

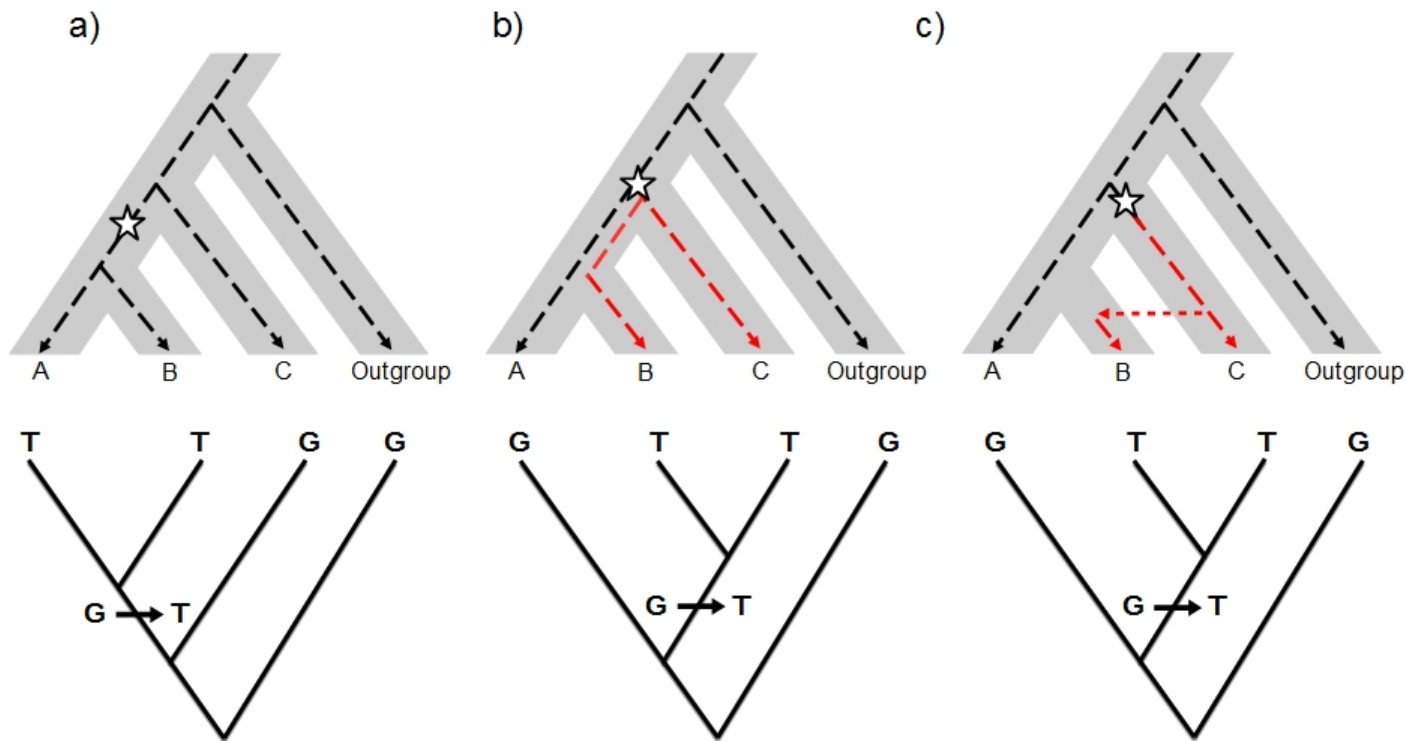

Figure 3



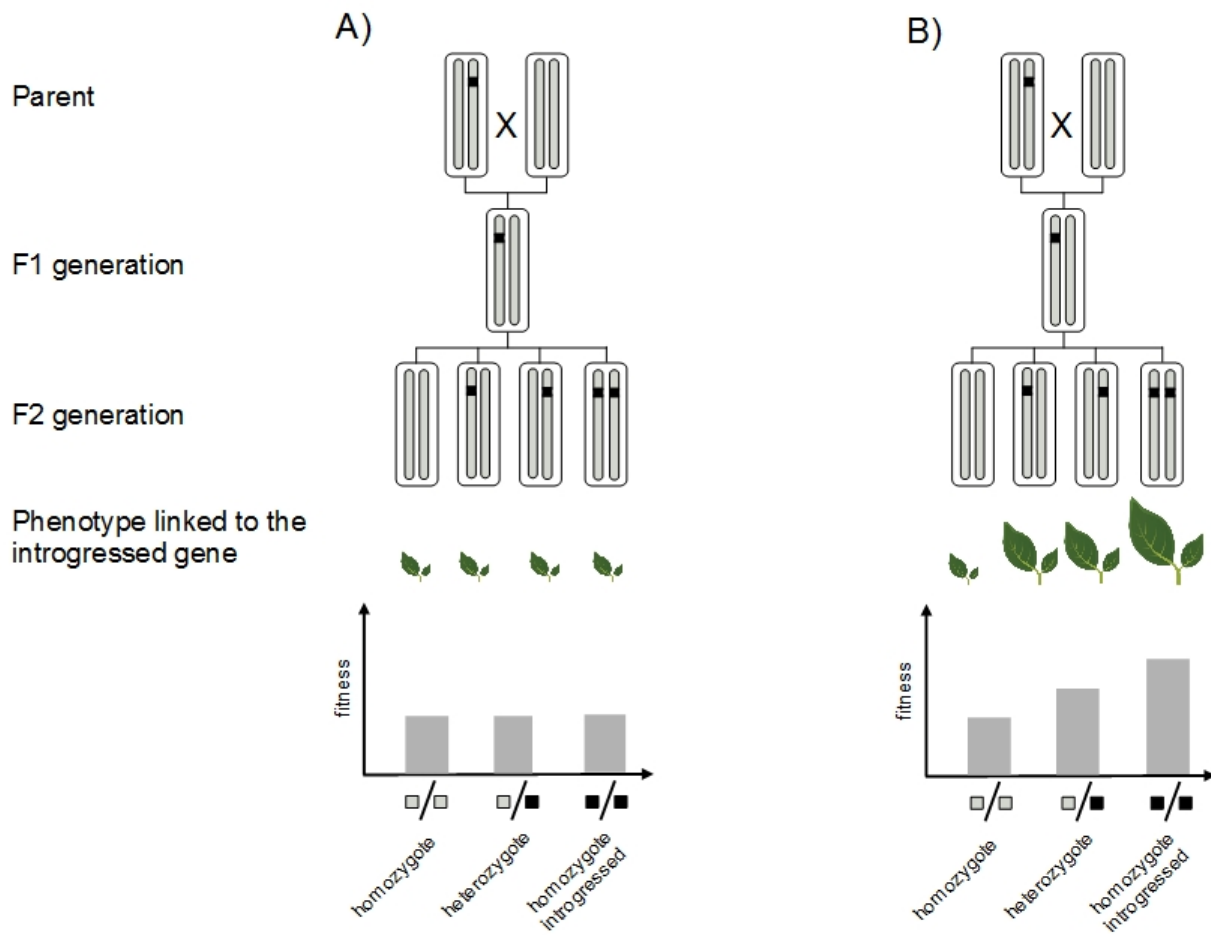

Figure 4.
